# Supplementary material for: Antibiotic-producing symbionts dynamically transition between plant pathogenicity and insect-defensive mutualism
Source: PubMed Central journal article supplement (PMC5414355; doi:10.1038/ncomms15172), 2017-04-28
Supplement: ncomms15172-s1.pdf [file ncomms15172-s1.pdf]

## Supplementary Note 1. Physicochemical data and antimicrobial activity of the symbiont-produced compounds

### Toxoflavin (1)

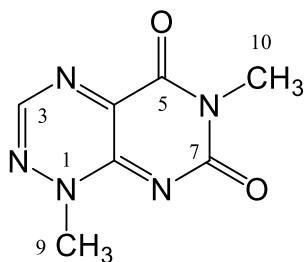

ESI(+)  $m/z$  194 (M+H)<sup>+</sup>, HRESI(+)-MS  $m/z$  194.0674 (calcd. for C<sub>7</sub>H<sub>8</sub>N<sub>5</sub>O<sub>2</sub> 194.0673)

UV (PDA):  $\lambda_{\max}$  = 258, 397 nm

NMR: d<sub>6</sub>-DMSO, <sup>1</sup>H NMR 600 MHz, <sup>13</sup>C NMR 150 MHz

| Carbon    | <sup>13</sup> C | <sup>1</sup> H (mult., J in Hz) |
|-----------|-----------------|---------------------------------|
| <b>3</b>  | 144.7           | 8.96 (s)                        |
| <b>4a</b> | 146.5           | -                               |
| <b>5</b>  | 154.1           | -                               |
| <b>7</b>  | 159.0           | -                               |
| <b>8a</b> | 150.9           | -                               |
| <b>9</b>  | 42.4            | 3.94 (s)                        |
| <b>10</b> | 28.2            | 3.24 (s)                        |

Antimicrobial activity (1 mg mL<sup>-1</sup>): An inhibition zone of 22 mm against *Brevibacillus laterosporus* was measured (procedure described in Methods section, *Antimicrobial bioassays*).

## Caryoynencin (2)

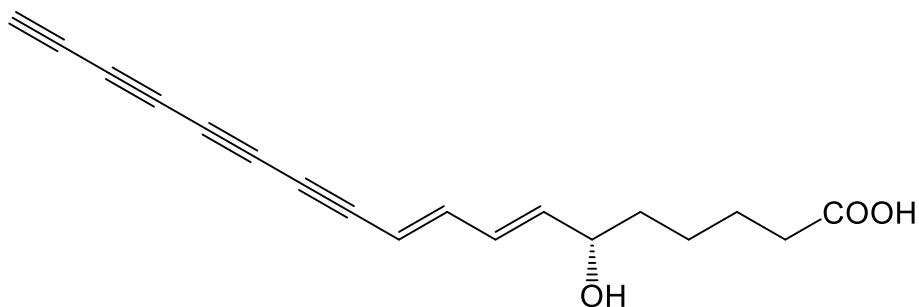

ESI(-)  $m/z$  279 (M-H)<sup>-</sup>, HRESI(-)-MS  $m/z$  279.1031 (calcd. for C<sub>18</sub>H<sub>17</sub>O<sub>3</sub> 279.1027)

UV (PDA):  $\lambda_{\max}$  = 294, 239, 280, 268, 358 nm.

Antimicrobial activity: active against *P. lilacinum* (see Methods, *Antimicrobial bioassays*) (Supplementary Fig. 21b).

## Lagriene (3)

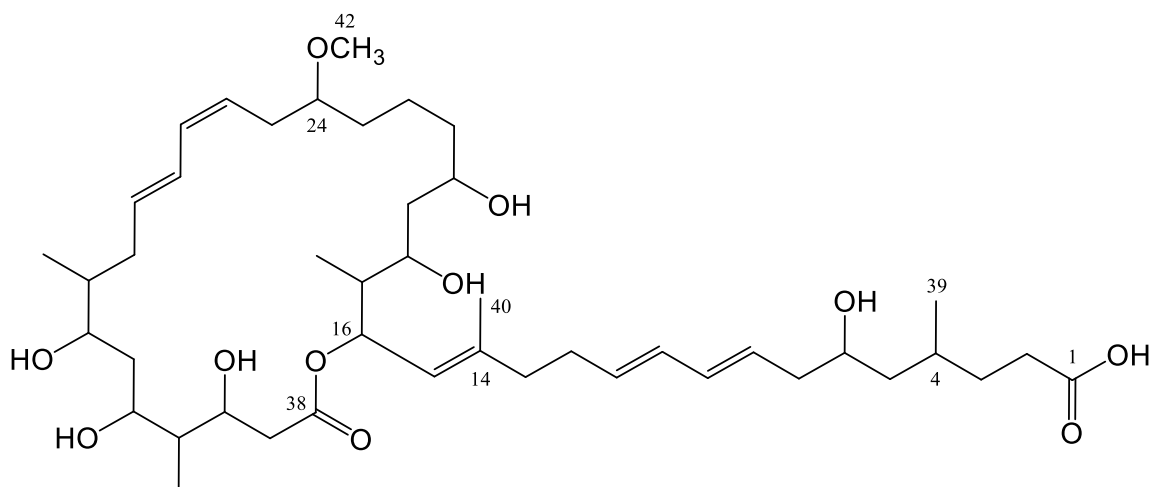

ESI(-)  $m/z$  777 (M-H)<sup>-</sup>, HRESI(-)-MS  $m/z$  777.5172 (calcd. for C<sub>44</sub>H<sub>73</sub>O<sub>11</sub> 777.5158)

UV (PDA):  $\lambda_{\max}$  = 231 nm

IR-spectrum:

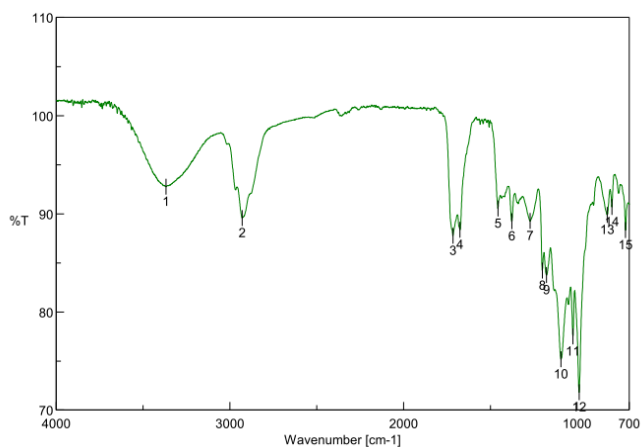

NMR:  $d_6$ -DMSO,  $^1\text{H}$  NMR 600 MHz,  $^{13}\text{C}$  NMR 150 MHz

| Carbon | $^{13}\text{C}$ | $^1\text{H}$ (mult., $J$ in Hz) |
|--------|-----------------|---------------------------------|
| 1      | 174.1           | -                               |
| 2      | 31.4            | 2.16 (m)                        |
| 3      | 32.4            | 1.47 (m)<br>1.32 (m)            |
| 4      | 28.2            | 1.60 (m)                        |
| 5      | 43.8            | 1.26 (m)<br>1.03 (m)            |
| 6      | 67.5            | 3.49 (m)                        |
| 7      | 41.5            | 2.08 (m)                        |
| 8      | 129.3           | 5.55 (m)                        |
| 9      | 131.6           | 5.95 (m)                        |
| 10     | 130.7           | 5.95 (m)                        |
| 11     | 131.2           | 5.48 (m)                        |
| 12     | 30.2            | 2.27 (m)<br>2.11 (m)            |
| 13     | 38.9            | 2.06 (m)<br>2.02 (t, 7.2)       |
| 14     | 139.1           | -                               |
| 15     | 122.9           | 5.00 (d, 9.5)                   |
| 16     | 72.1            | 5.26 (m)                        |
| 17     | 41.8            | 1.78 (m)                        |
| 18     | 66.5            | 3.77 (s)                        |
| 19     | 39.3            | 1.45 (m)<br>1.32 (m)            |
| 20     | 66.8            | 3.62 (m)                        |
| 21     | 38.3            | 1.48 (m)                        |
| 22     | 20.6            | 1.35 (m)<br>1.21 (m)            |
| 23     | 31.9            | 1.36 (m)                        |
| 24     | 79.6            | 3.21 (m)                        |
| 25     | 30.1            | 2.38 (m)<br>2.27 (m)            |
| 26     | 125.1           | 5.26 (m)                        |
| 27     | 130.1           | 6.00 (m)                        |
| 28     | 126.6           | 6.29 (m)                        |

|           |       |                      |
|-----------|-------|----------------------|
| <b>29</b> | 133.6 | 5.72 (m)             |
| <b>30</b> | 36.5  | 2.18 (m)             |
| <b>31</b> | 37.7  | 1.48 (m)             |
| <b>32</b> | 71.7  | 3.53 (m)             |
| <b>33</b> | 39.3  | 1.45 (m)<br>1.32 (m) |
| <b>34</b> | 69.2  | 3.84 (m)             |
| <b>35</b> | 43.6  | 1.33 (m)             |
| <b>36</b> | 68.6  | 3.81 (m)             |
| <b>37</b> | 39.6* | 2.45 (m)<br>2.15 (m) |
| <b>38</b> | 170.4 | -                    |
| <b>39</b> | 18.8  | 0.80 (m)             |
| <b>40</b> | 16.6  | 1.68 (s)             |
| <b>41</b> | 10.5  | 0.71 (d, 7.0)        |
| <b>42</b> | 55.6  | 3.22 (s)             |
| <b>43</b> | 13.1  | 0.79 (m)             |
| <b>44</b> | 9.7   | 0.76 (d, 7.0)        |

\* signal overlapping with solvent signal

Antimicrobial activity (1 mg mL<sup>-1</sup>): Inhibition zones of 23 mm against *Bacillus thuringiensis*, 30 mm against *Mycobacterium vaccae*, 19 mm against vancomycin-resistant *Enterococcus faecalis*, and 18 mm against methicillin-resistant *Staphylococcus aureus* were measured (procedure described in Methods section, *Antimicrobial bioassays*).

#### Sinapigliadioside (4)

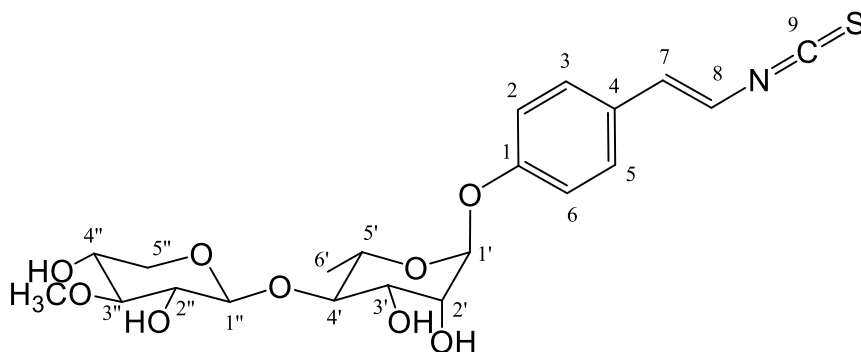

ESI(-)  $m/z$  468 (M-H)<sup>-</sup>, HRESI(-)-MS  $m/z$  468.1334 (calcd. for C<sub>21</sub>H<sub>26</sub>NO<sub>9</sub>S 468.1334)

UV (PDA):  $\lambda_{\max}$  = 312 nm.

IR-spectrum:

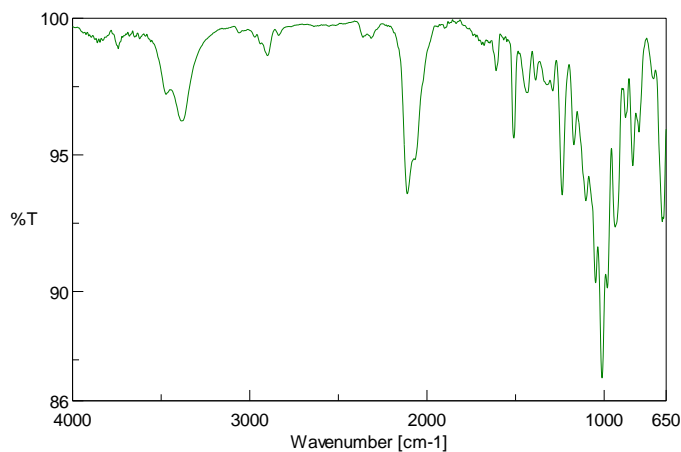

NMR:  $d_6$ -DMSO,  $^1\text{H}$  NMR 600 MHz,  $^{13}\text{C}$  NMR 150 MHz

| Carbon                     | $^{13}\text{C}$ | $^1\text{H}$ (mult., $J$ in Hz) |
|----------------------------|-----------------|---------------------------------|
| <b>1</b>                   | 156.4           | -                               |
| <b>2</b>                   | 116.7           | 7.04 (d, 8.8)                   |
| <b>3</b>                   | 128.0           | 7.43 (d, 8.8)                   |
| <b>4</b>                   | 127.3           | -                               |
| <b>5</b>                   | 128.0           | 7.43 (d, 8.8)                   |
| <b>6</b>                   | 116.7           | 7.04 (d, 8.8)                   |
| <b>7</b>                   | 131.7           | 6.86 (d, 13.9)                  |
| <b>8</b>                   | 114.0           | 7.00 (d, 13.9)                  |
| <b>9</b>                   | 131.5           | -                               |
| <b>1'</b>                  | 97.5            | 5.46 (d, 1.6)                   |
| <b>2'</b>                  | 69.3            | 3.92 (m)                        |
| <b>3'</b>                  | 68.9            | 3.75 (m)                        |
| <b>4'</b>                  | 81.8            | 3.48 (m)                        |
| <b>5'</b>                  | 67.9            | 3.59 (m)                        |
| <b>6'</b>                  | 17.3            | 1.20 (d, 6.2)                   |
| <b>1''</b>                 | 104.0           | 4.25 (d, 7.8)                   |
| <b>2''</b>                 | 72.7            | 3.10 (m)                        |
| <b>3''</b>                 | 86.2            | 2.93 (t, 9.0)                   |
| <b>4''</b>                 | 68.8            | 3.42 (m)                        |
| <b>5''</b>                 | 65.7            | 3.75 (m)<br>3.17 (t, 10.9)      |
| <b>3''-OCH<sub>3</sub></b> | 60.0            | 3.50 (s)                        |
| <b>2'-OH</b>               | -               | 5.25 (d, 4.3)                   |
| <b>3'-OH</b>               | -               | 4.32 (d, 2.5)                   |
| <b>2''-OH</b>              | -               | 5.35 (d, 5.4)                   |
| <b>4''-OH</b>              | -               | 5.15 (d, 5.5)                   |

Antimicrobial activity ( $1 \text{ mg mL}^{-1}$ ): Inhibition zones of 30 mm against *P. lilacinum*, 32 mm against *Aspergillus fumigatus* and 25 mm against *Penicillium notatum* were measured (procedure described in Methods section, *Antimicrobial bioassays*) (Supplementary Fig. 21a).

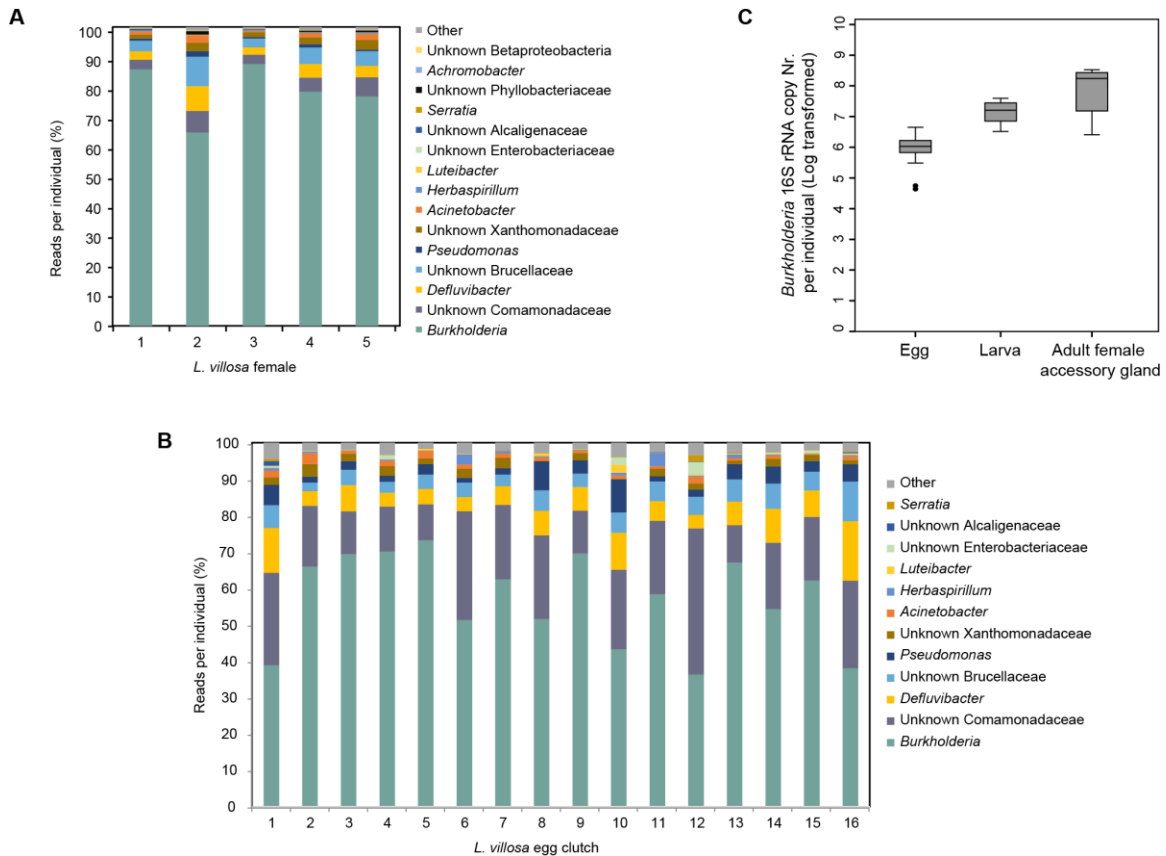

**Supplementary Fig. 1. *Burkholderia* is consistently the most abundant taxon in *Lagria villosa* eggs, larvae and the accessory glands associated with the reproductive tract of adult females.** Microbial composition as revealed by 454 pyrosequencing of partial 16S rRNA gene sequences carried out on (A) the accessory glands of six field-collected *L. villosa* females and (B) 16 egg clutches laid by field-collected *L. villosa* females, based on 97% similarity OTU clustering as described in the methods section (Microbial community analysis); (C) Quantification of *Burkholderia* symbionts by qPCR using a 172 bp region of the 16S rRNA gene as described in the methods section (Horizontal Transmission experiment) in 15 egg clutches (abundance per individual egg is represented), six larvae between 32 and 43 days old, and eight accessory glands from adult females (abundance for a single gland per individual is represented). The center value of the boxplots represents the median, and the whiskers denote minimum and maximum values.

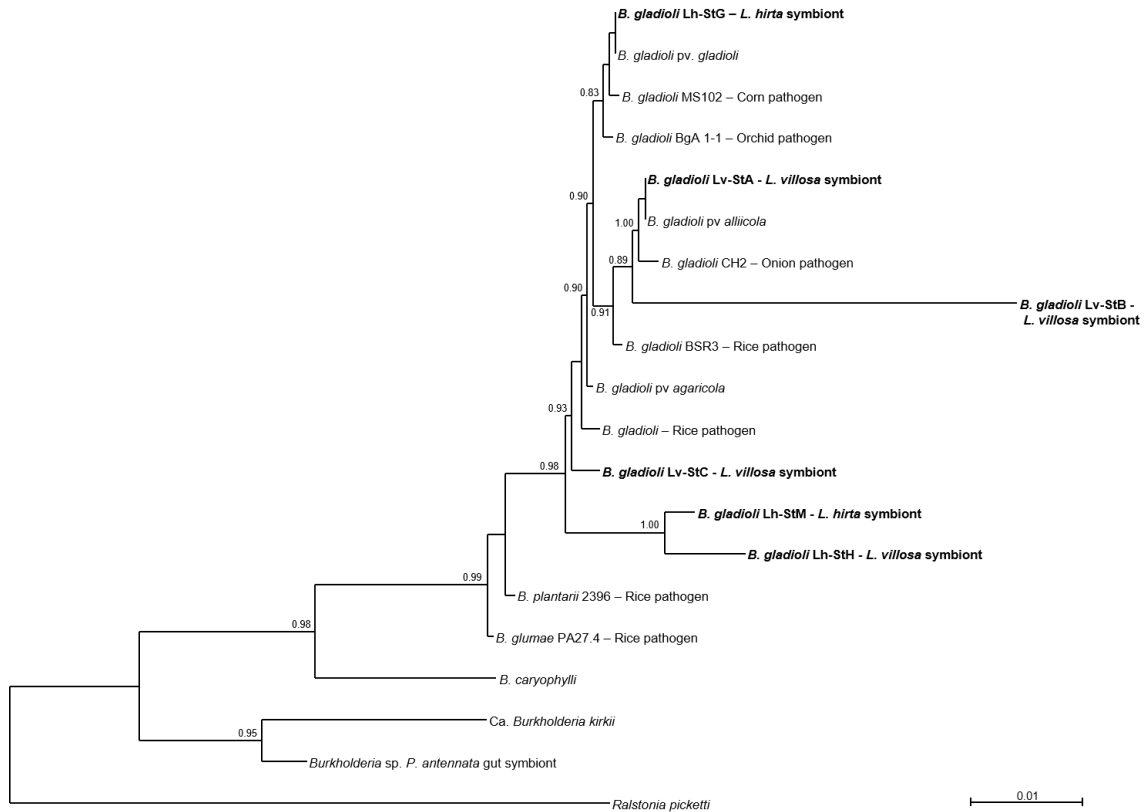

**Supplementary Fig. 2. *L. villosa* beetles, as well as the related species *L. hirta*, carry at least three symbiotic *B. gladioli* strains.** Phylogenetic reconstruction based on an approximately-maximum-likelihood algorithm of selected *Burkholderia* using partial 16S rRNA gene sequences (1,169 bp), showing the placement of the *L. villosa* - associated strains relative to other *Burkholderia*. Local support values above 0.7 are reported at the nodes. References to sequences extracted from public databases are listed in Supplementary Table 1.

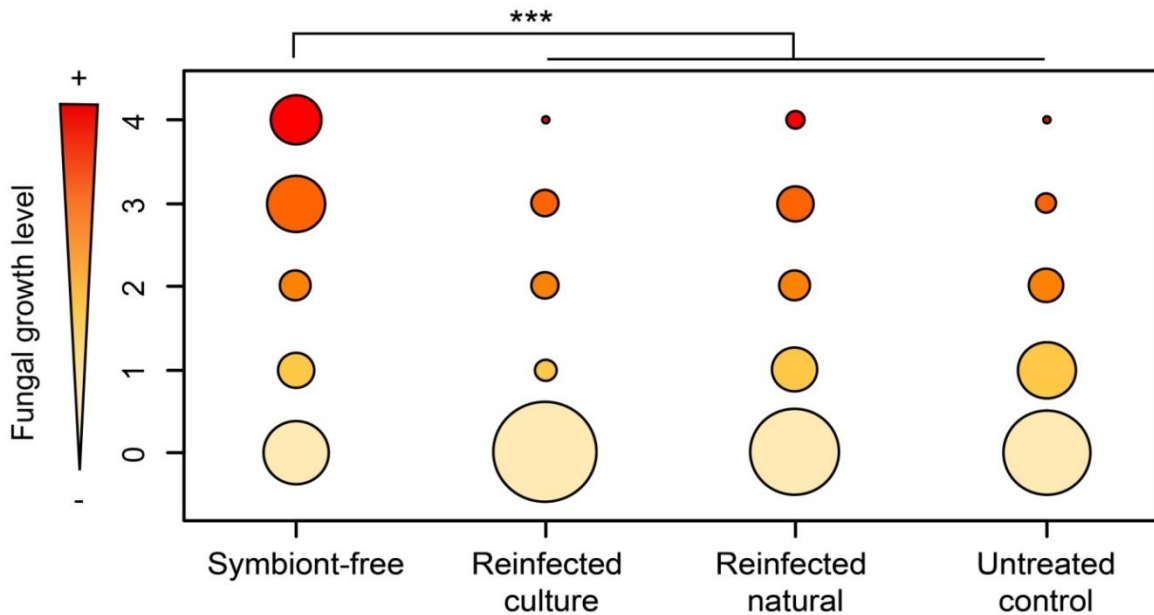

**Supplementary Fig. 3. When present, *P. lilacinum* reaches higher biomass on *L. villosa* eggs in the absence of the *Burkholderia* symbionts.** Fungal growth was estimated qualitatively during blind monitoring of 720 eggs (180 eggs per treatment from 6 independent clutches) as described in the methods section (*Fungal inhibition on eggs and survival assays*), assigning the level of growth to one of the following categories (0 = no visible growth, 1 = minor growth directly on surface and barely noticeable, 2 = multiple mycelia in contact with surface, 3 = considerable growth on surface, 4 = surface completely covered by mycelia). For statistical analysis, a generalized linear mixed model with a Poisson distribution and clutch as random factor was used (\*\*\*)  $p < 0.001$ ). The radius of each circle corresponds to the number of eggs in the respective category.



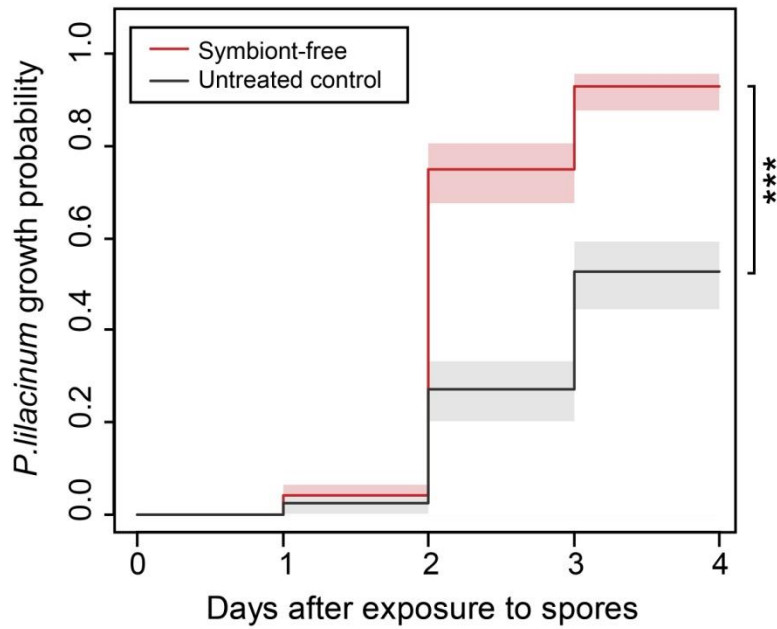

**Supplementary Fig. 4. Eggs laid by symbiont-free *L. villosa* females are less protected against *P. lilacinum* fungal growth in comparison to their symbiotic counterparts.** Symbiont-free females were obtained by rearing from surface-sterilized eggs, while symbiotic females were taken from the normal beetle culture. For each treatment, six clutches and 30 eggs per clutch were tested as described in the methods section excluding reinfection procedures (*Fungal inhibition on eggs and survival assays*). For statistical analysis, a Cox mixed effects model including clutch as a random factor was used (\*\*\*) $p < 0.001$ ). Estimated survival curves (Kaplan-Meier) and the corresponding standard error are plotted.

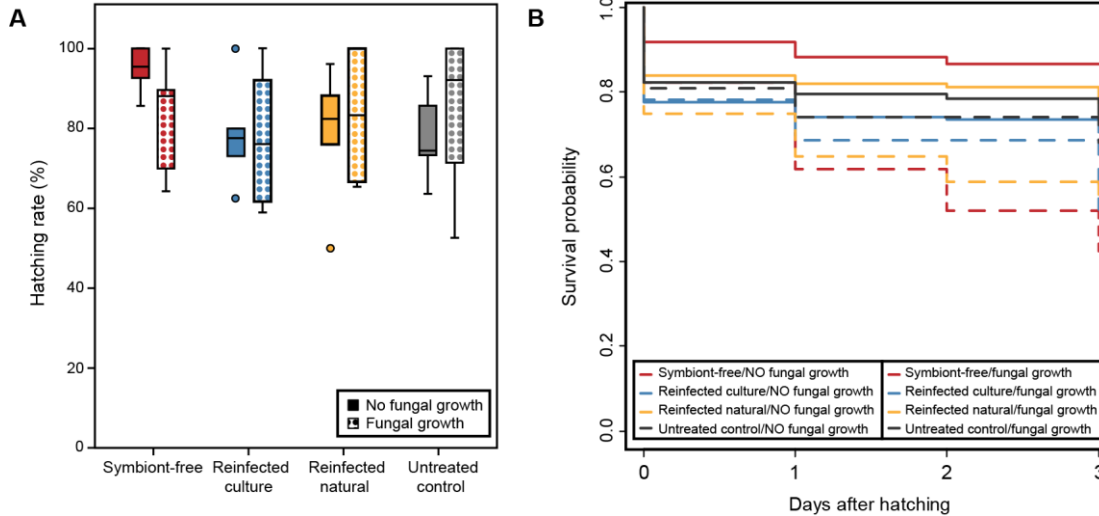

**Supplementary Fig. 5. The detrimental effect of *P. lilacinum* growth on *L. villosa* eggs does not significantly reflect on hatching rate, but it causes increased larval mortality in the first days after hatching.** (A) There was no statistically significant effect of either treatment or fungal growth level on hatching rate of the six egg clutches (Generalized linear mixed model with a Poisson distribution,  $p > 0.05$ ). The center value of the boxplots represents the median, the whiskers denote minimum and maximum values, and circles represent outliers (more than 1.5 interquartile ranges from nearest box edge). (B) Fungal growth on the eggs has a negative effect on the survival of the larvae during the first days after hatching and affects individuals from the treatments differently, with aposymbionts showing the most pronounced effect (Cox Mixed-Effects Model; Fungus,  $p < 0.001$ ; Treatment:Fungus,  $p < 0.05$ ). Survival curves based on Kaplan-Meier estimates are plotted. For both (A) and (B), sample sizes were as follows: Symbiont-free: no fungal growth 60, fungal growth 118; Reinfected culture: no fungal growth 147, fungal growth 32; Reinfected natural: no fungal growth 111, fungal growth 68; Untreated control: no fungal growth 107, fungal growth 73.

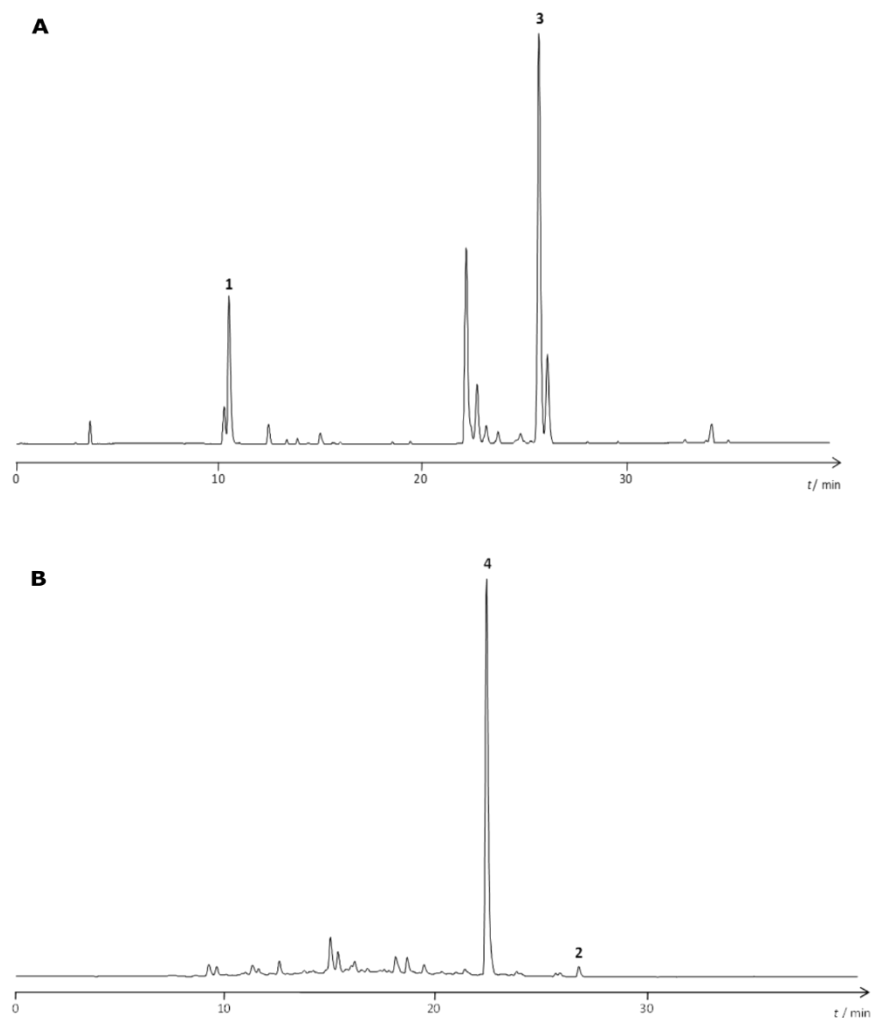

**Supplementary Fig. 6. HPLC profiles of crude extracts of *B. gladioli* Lv-StA liquid cultures indicating the production of compounds (1-4) *in vitro*.** (A). Chromatogram (PDA total scan) of the crude extract of *B. gladioli* Lv-StA cultured on MGY medium. Numbers indicate production of toxoflavin (1) and lagriene (3). (B) HPLC profile (294 nm) of the crude extract of *B. gladioli* Lv-StA cultured on PDB medium. Numbers indicate production of caryoynencin (2) and sinapiogladioside (4).

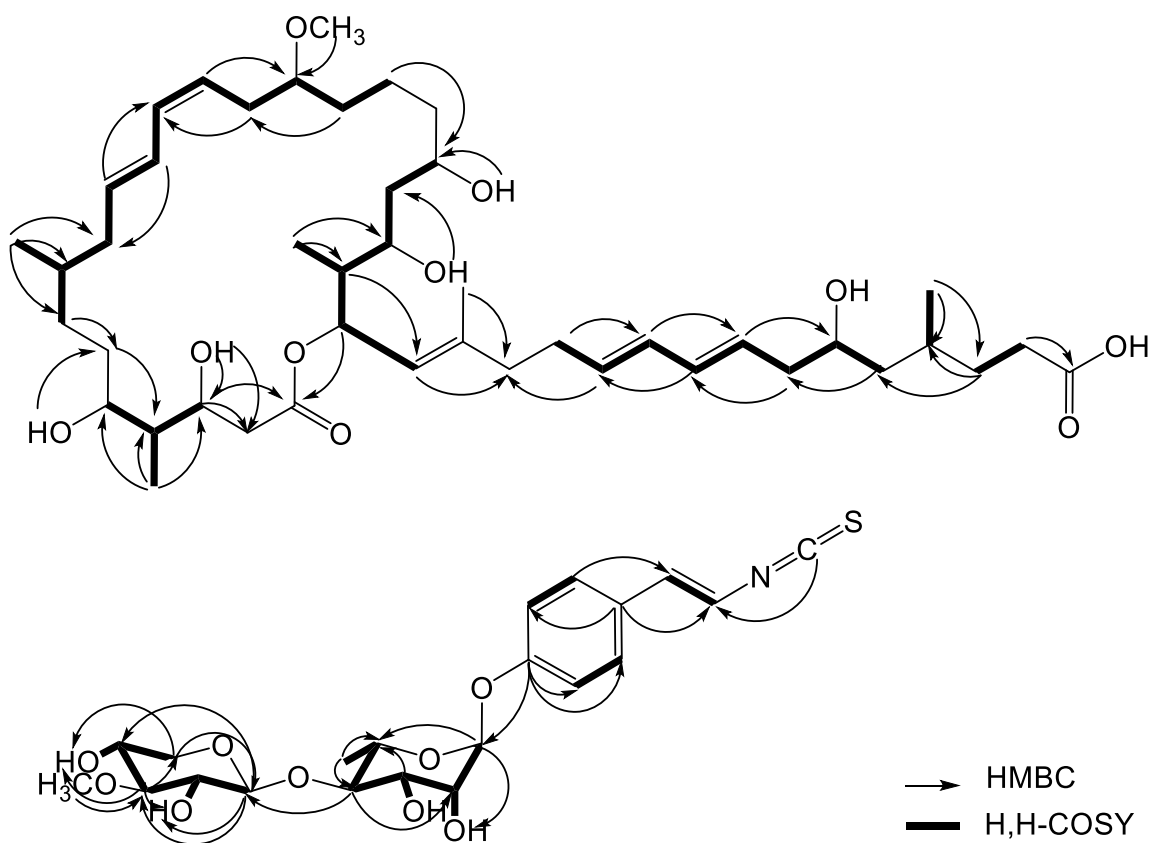

**Supplementary Fig. 7. Key 2D NMR couplings of lagriene (3) and sinapigliadioside (4).**

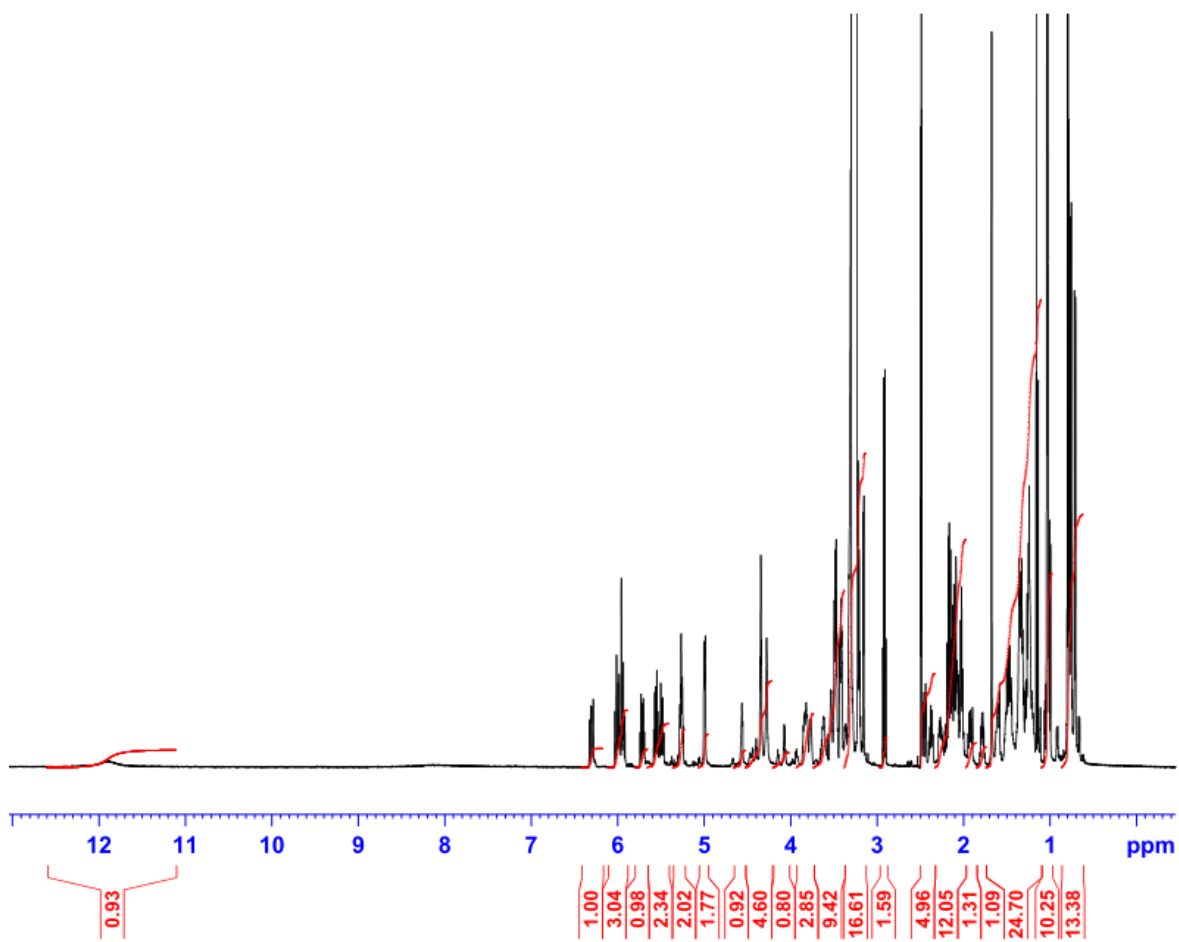

Supplementary Fig. 8. <sup>1</sup>H NMR spectrum of lagriene (3).

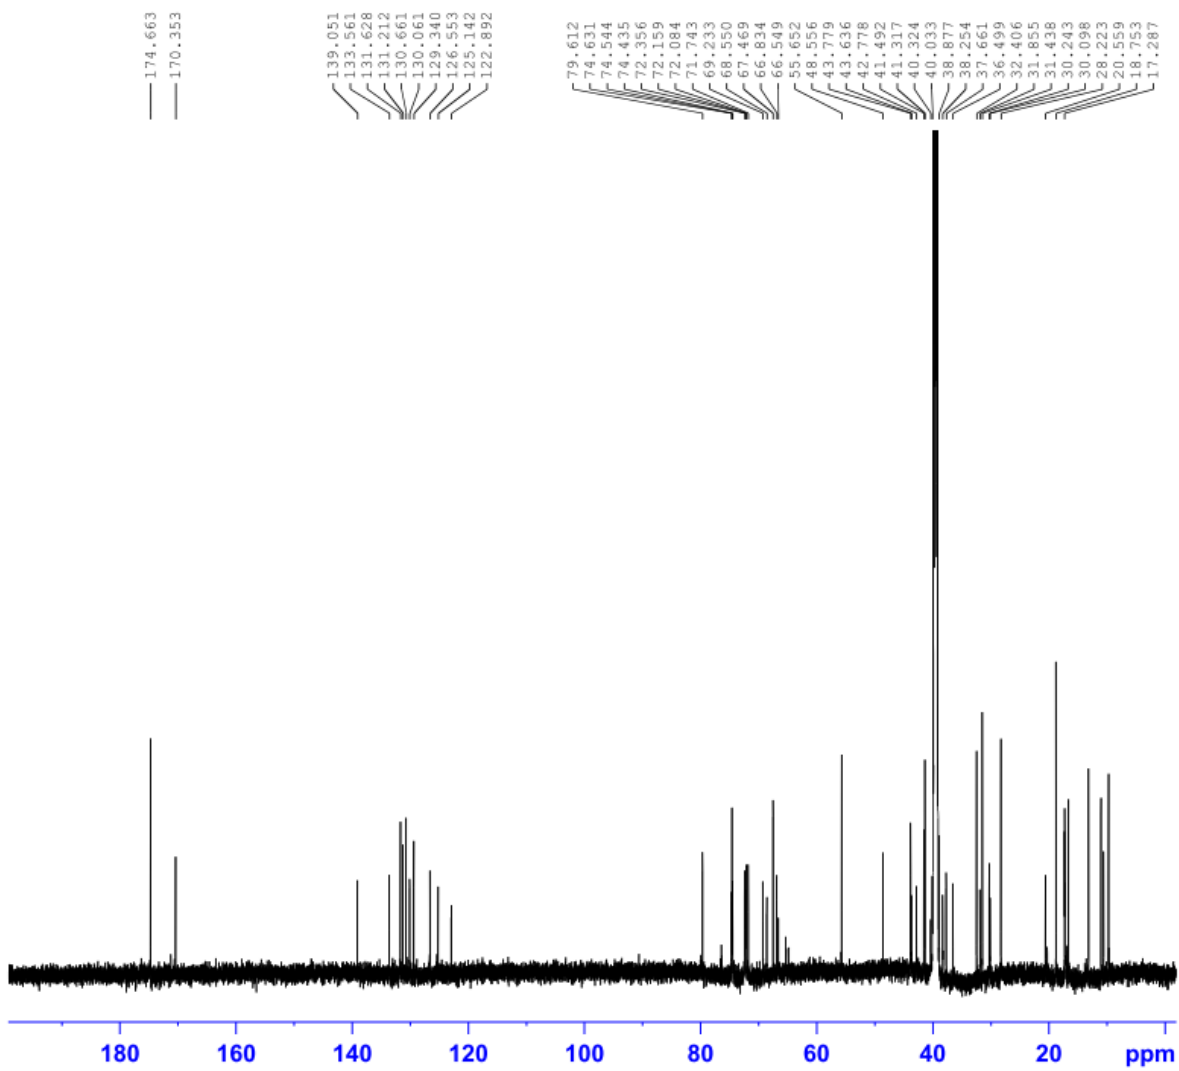

Supplementary Fig. 9.  $^{13}\text{C}$  NMR spectrum of lagriene (3).

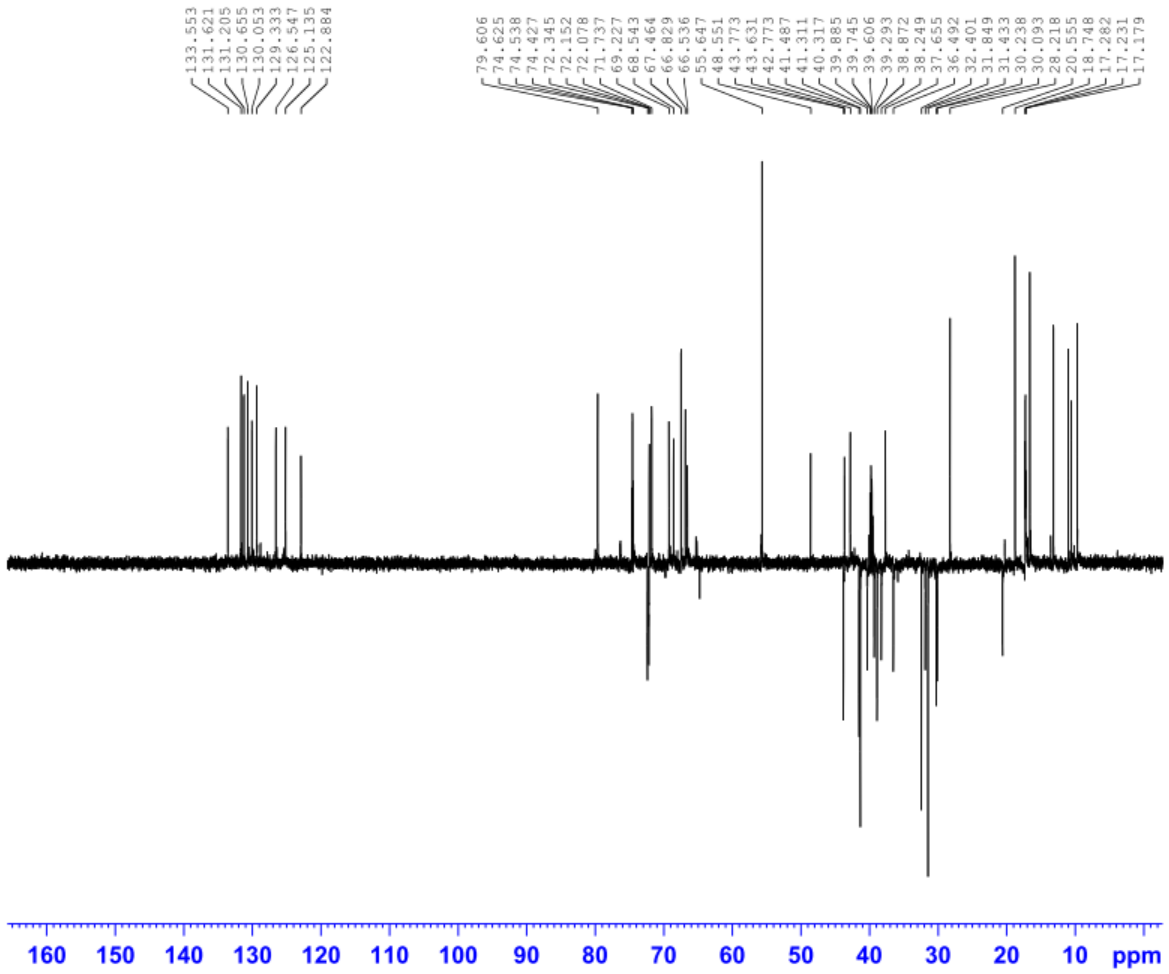

Supplementary Fig. 10. DEPT135 NMR spectrum of lagriene (3).

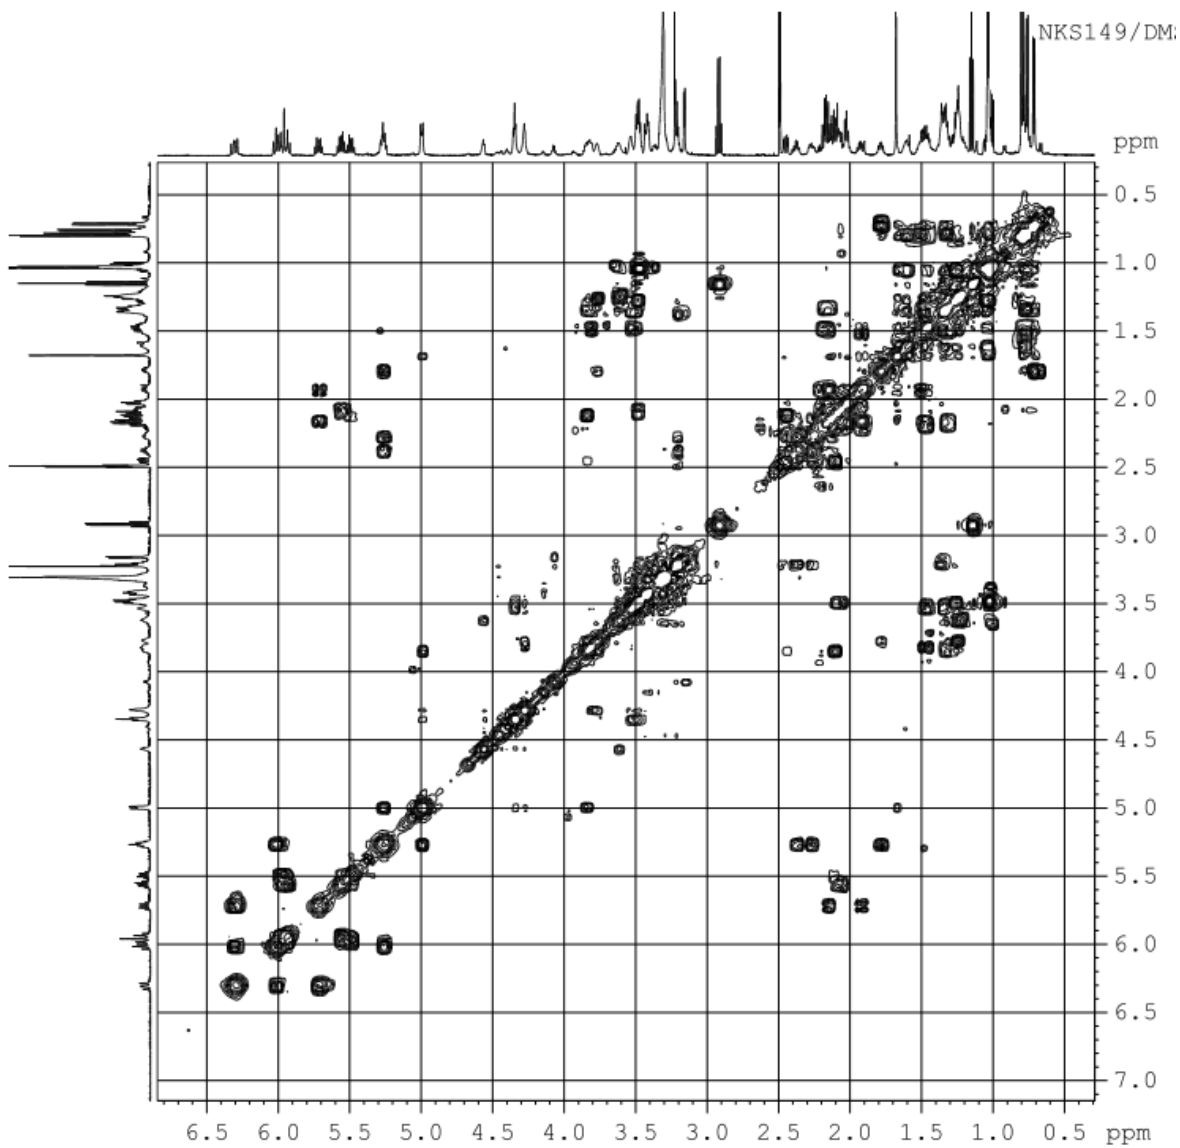

**Supplementary Fig. 11. H,H-COSY spectrum of lagriene (3).**



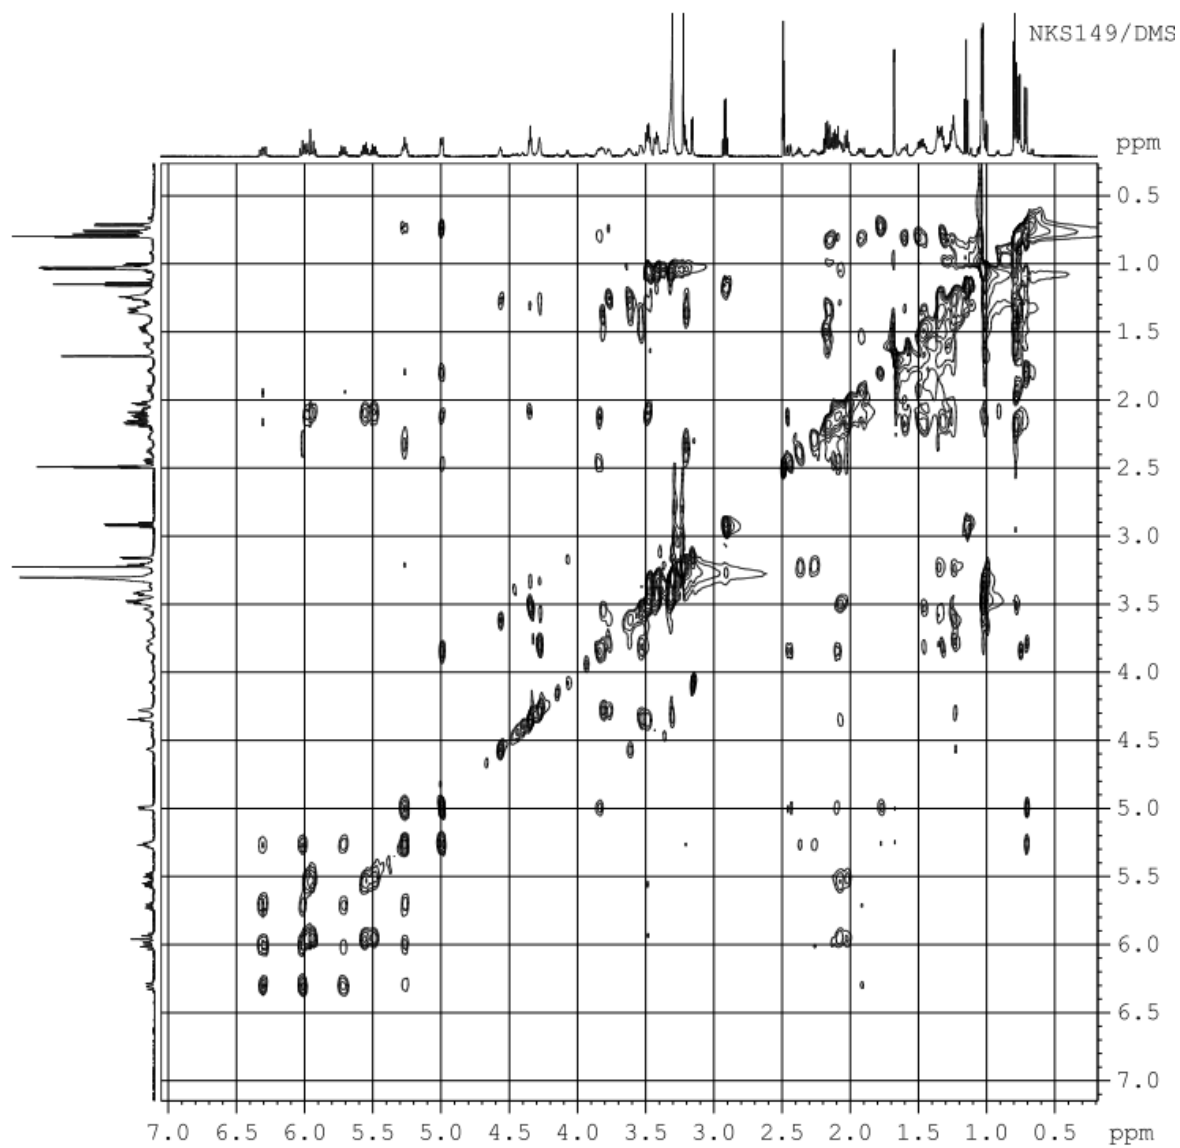

**Supplementary Fig. 12. TOCSY spectrum of lagriene (3).**

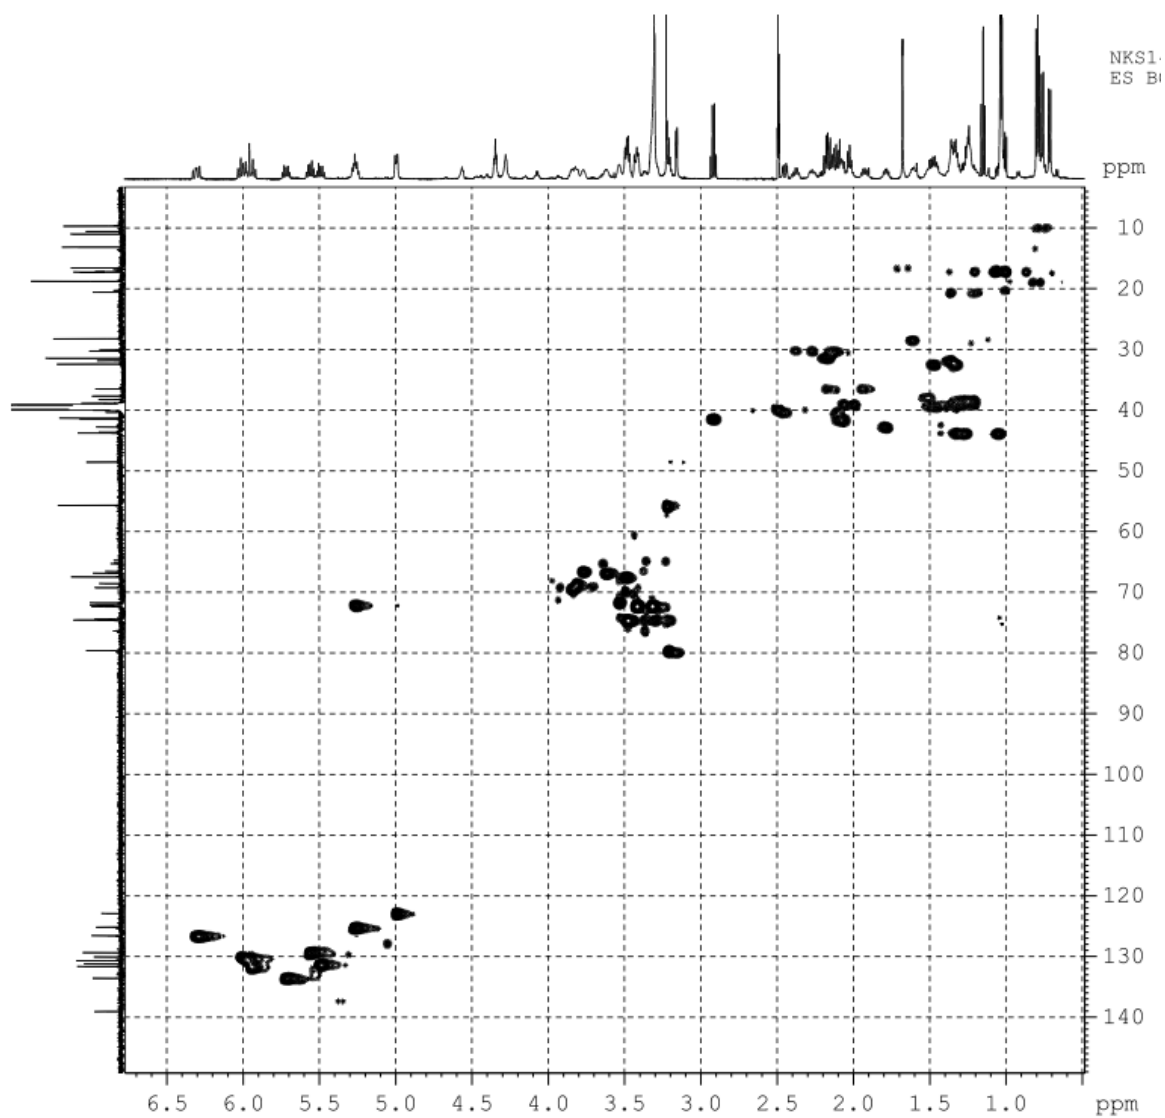

**Supplementary Fig. 13.** HSQC spectrum of lagriene (3).

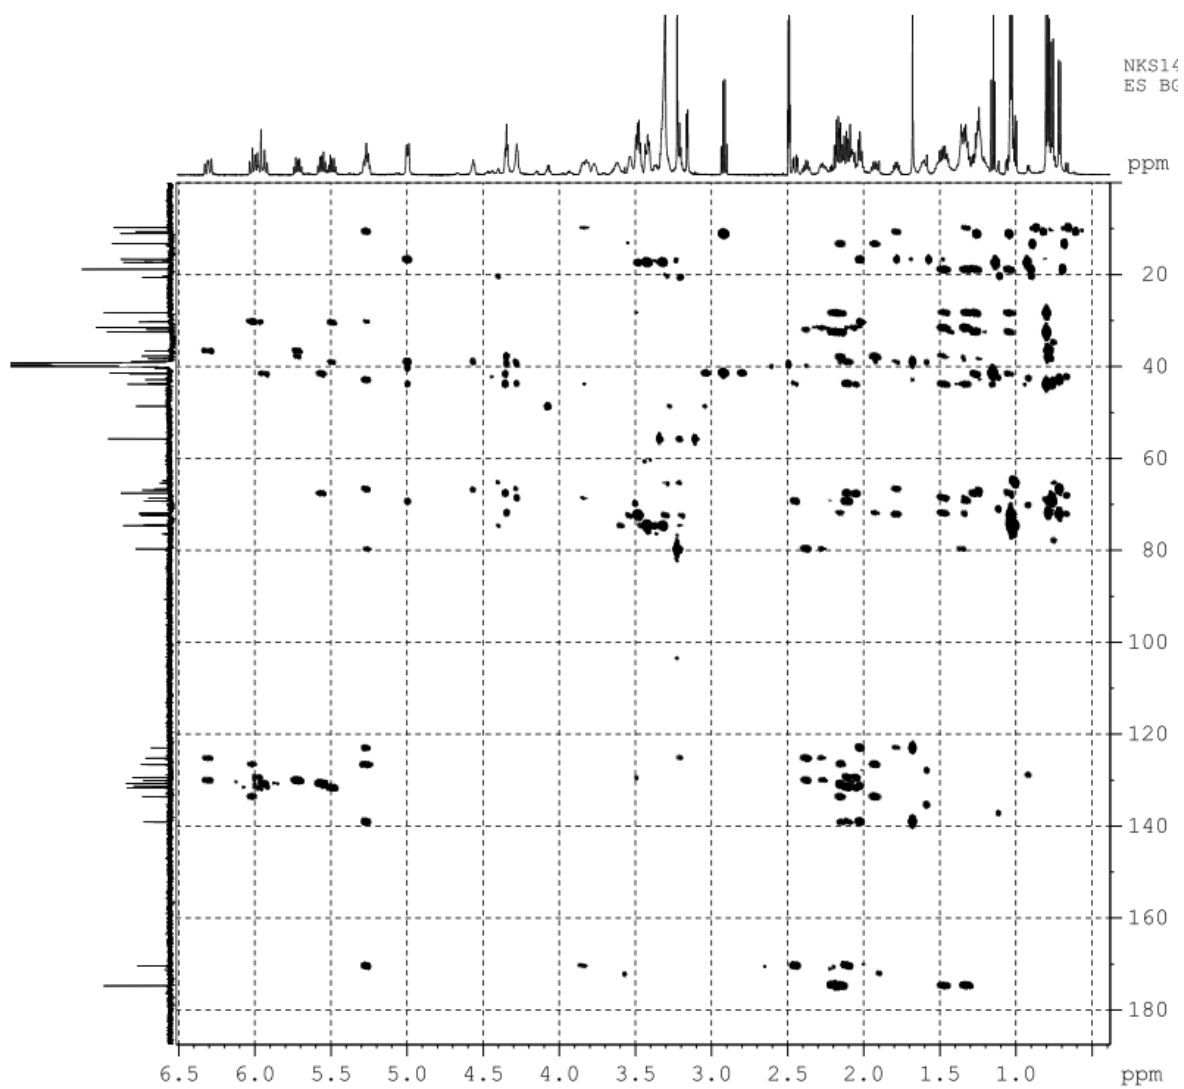

**Supplementary Fig. 14. HMBC spectrum of lagriene (3).**

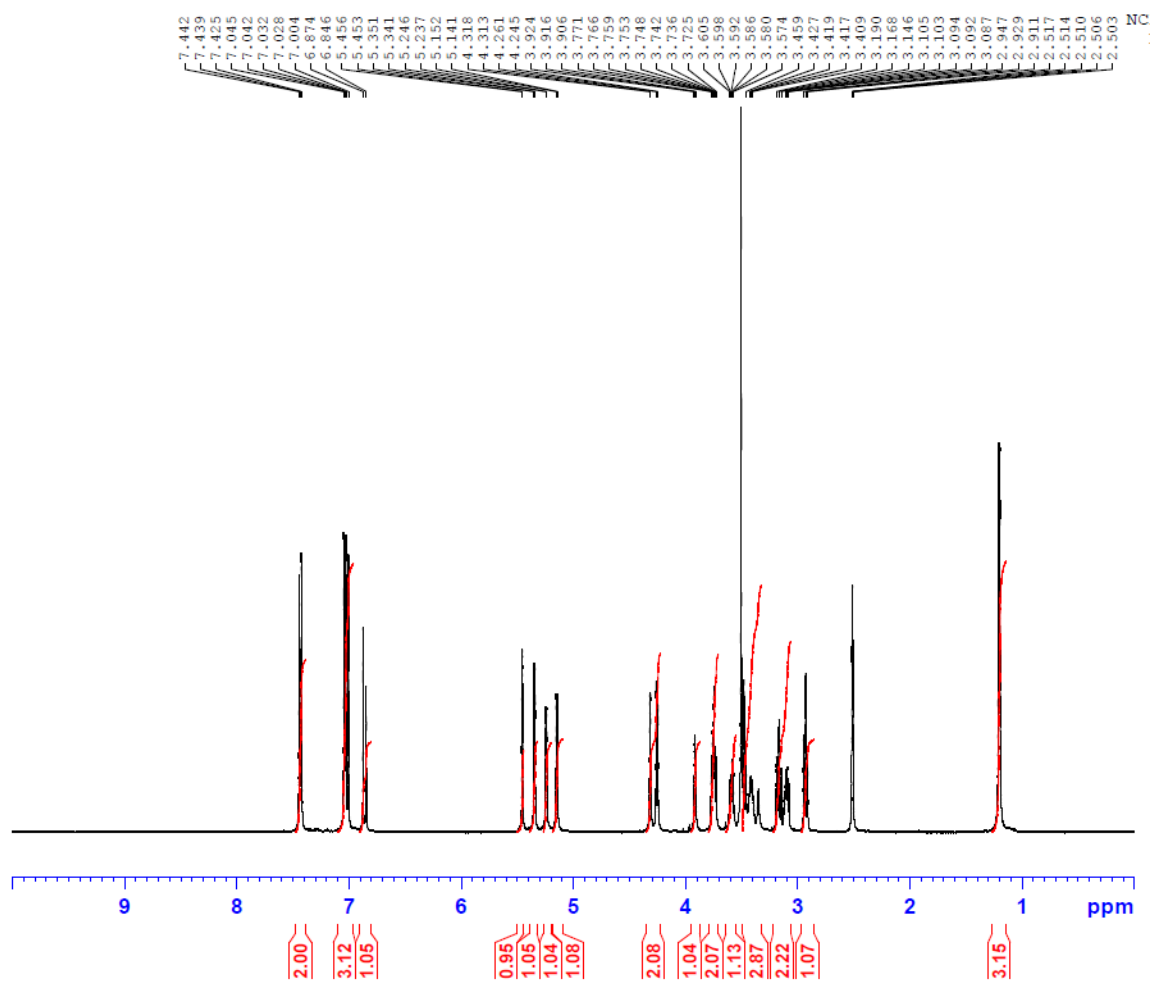

Supplementary Fig. 15. <sup>1</sup>H NMR spectrum of sinapigliadioside (4).

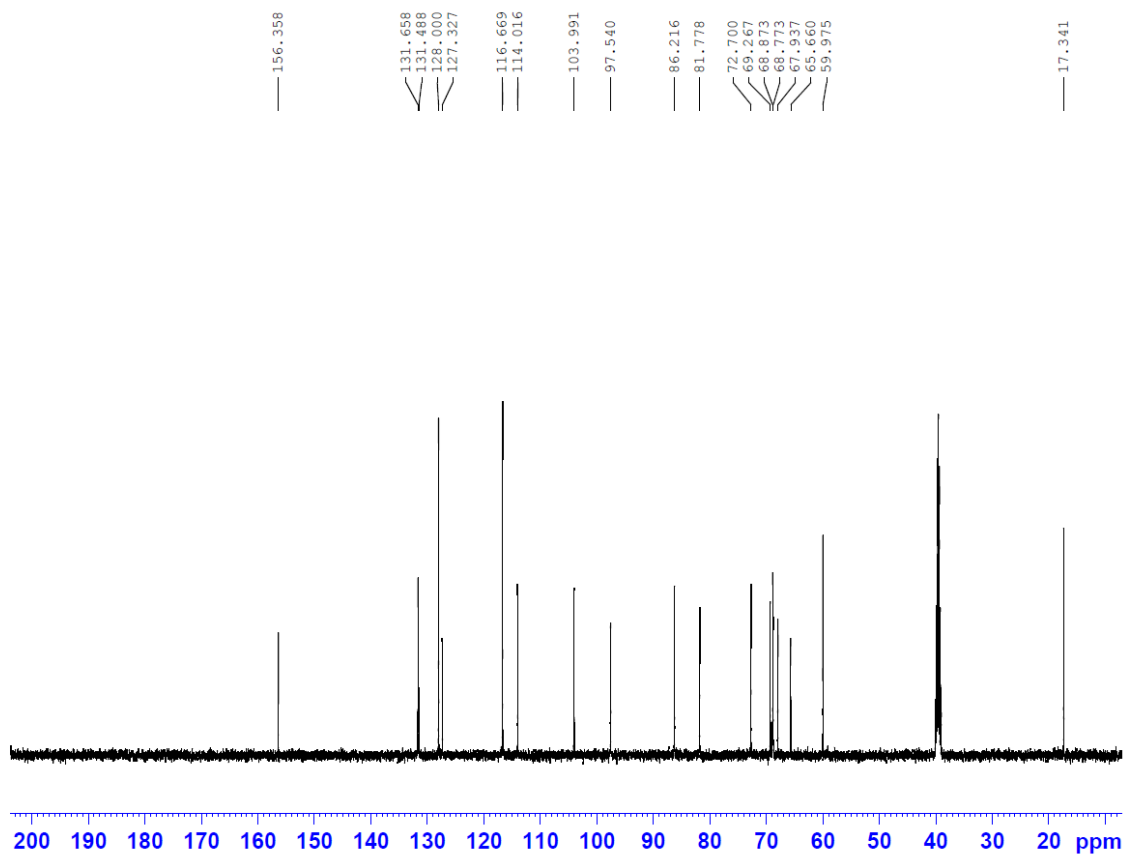

**Supplementary Fig. 16.** <sup>13</sup>C NMR spectrum of sinapigliadoside (4).

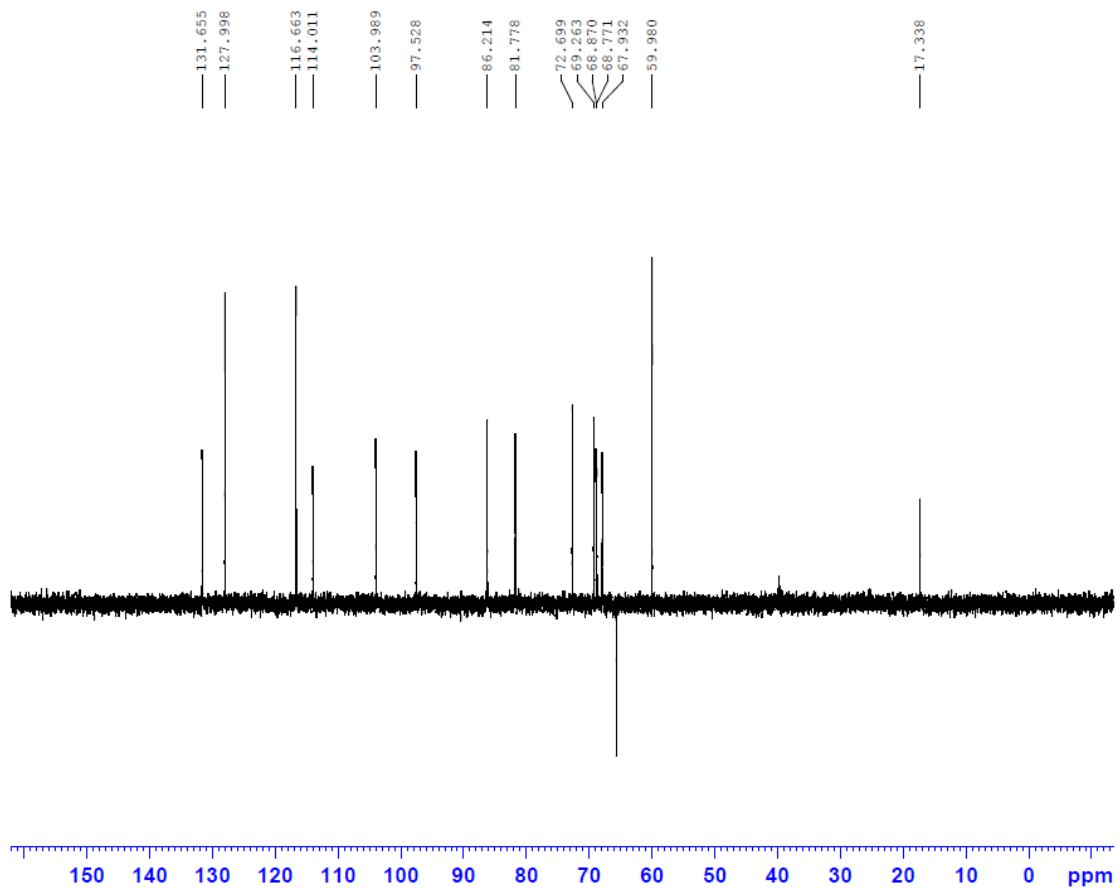

**Supplementary Fig. 17. DEPT135 NMR spectrum of sinapgladioside (4).**

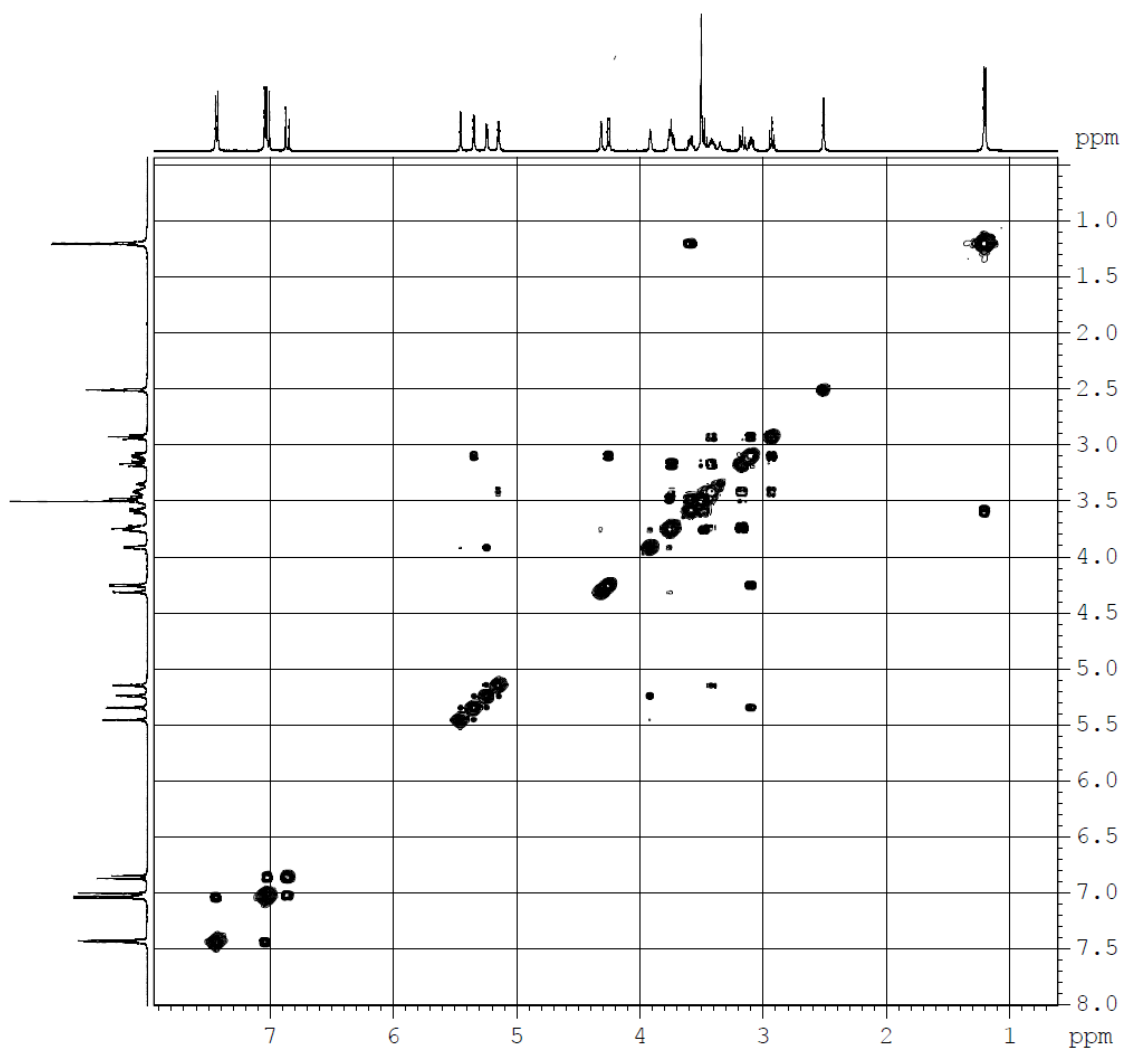

**Supplementary Fig. 18. H,H-COSY spectrum of sinapigliadoside (4).**

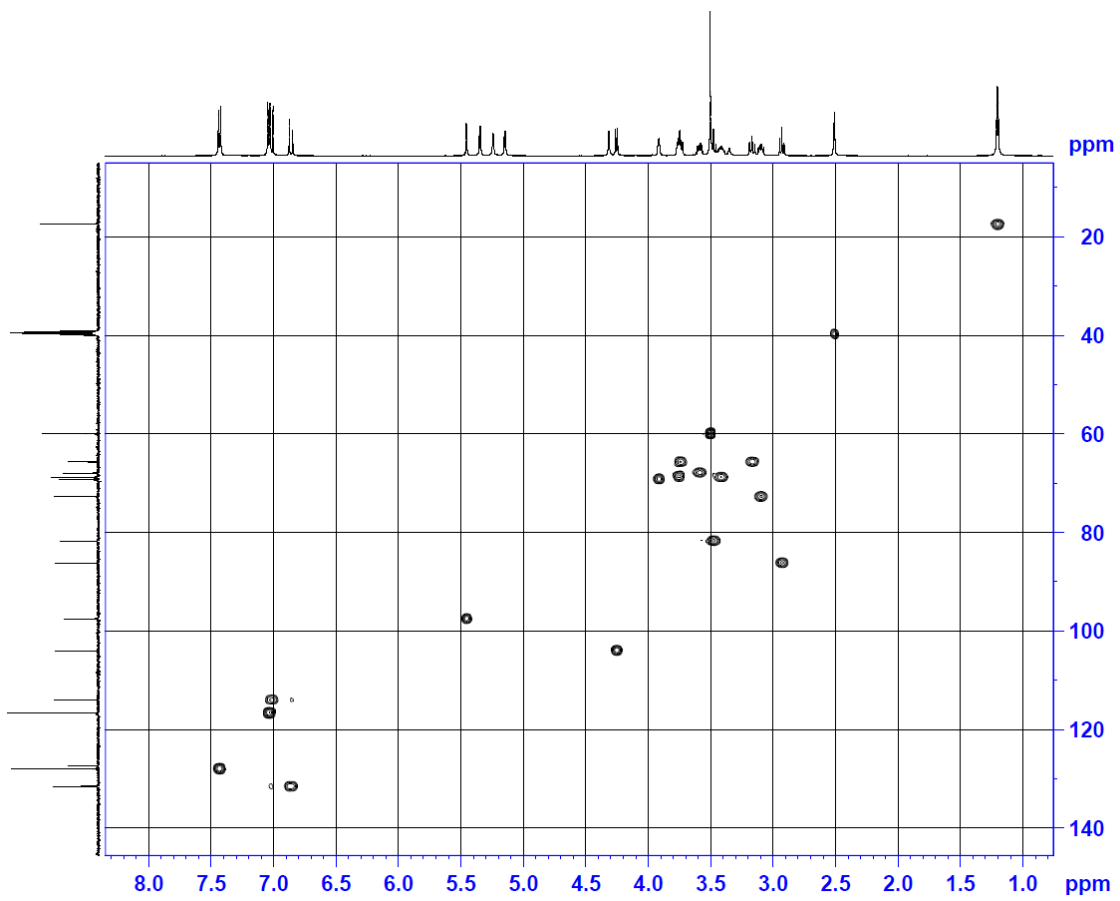

**Supplementary Fig. 19. HSQC spectrum of sinapigliadioside (4).**



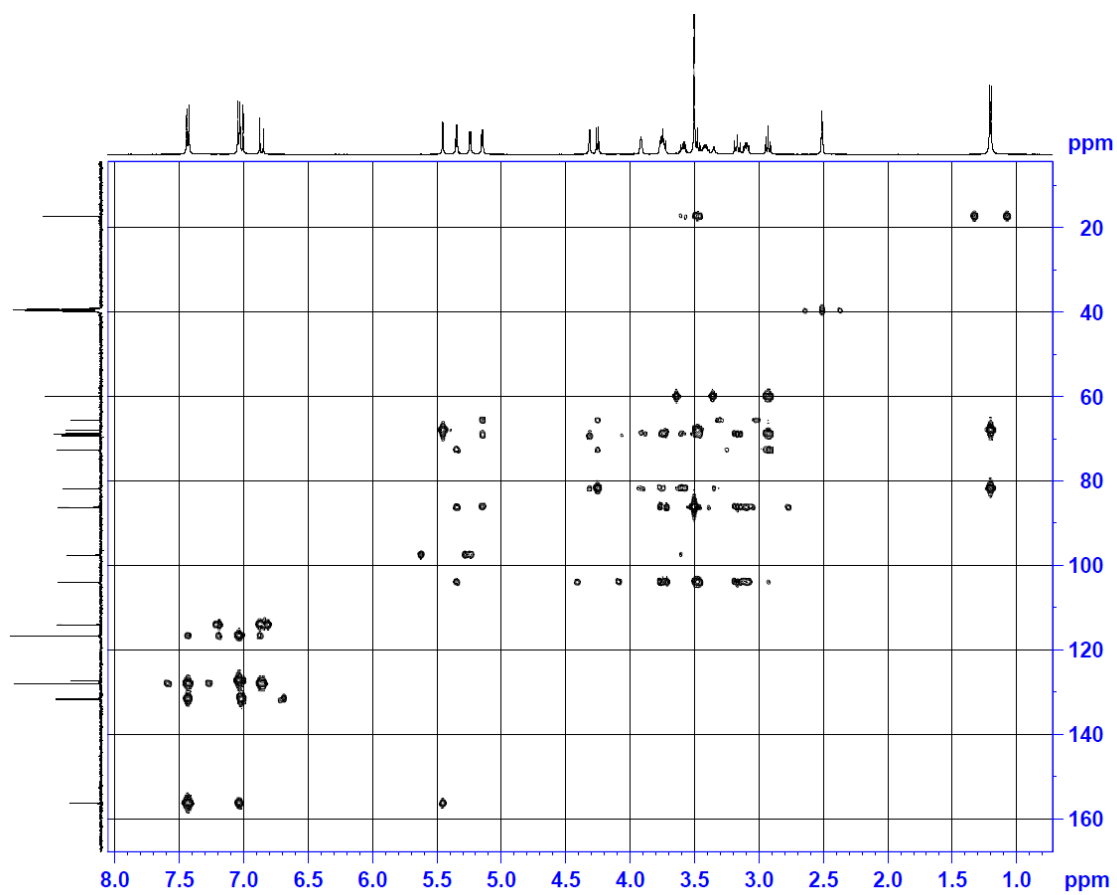

**Supplementary Fig. 20. HMBC spectrum of sinapigliadioside (4).**

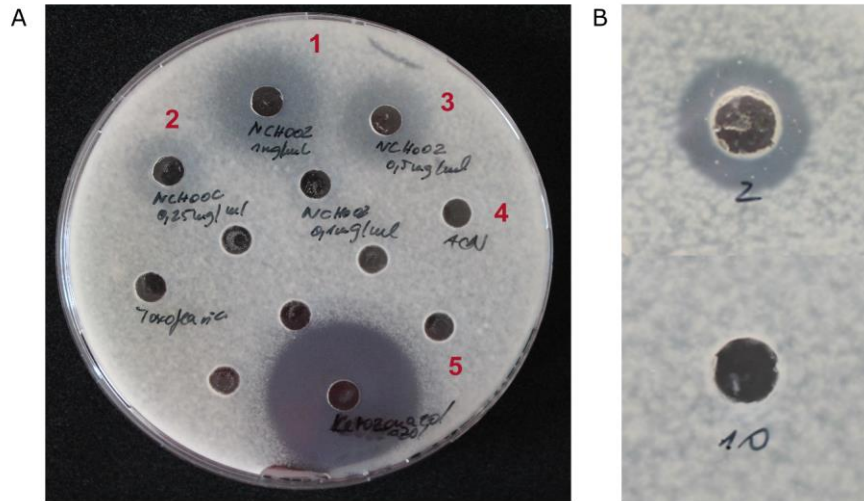

**Supplementary Fig. 21. The *B. gladioli* symbionts produce metabolites that are active against *Purpureocillium lilacinum*, a natural fungal antagonist of *L. villosa*.** (A) Sinapigliadioside produced by *L. villosa* StA exhibits antifungal activity against *P. lilacinum*. Wells 1-3 correspond to sinapigliadioside at 1, 0.5 and 0.25 mg mL<sup>-1</sup> respectively, well 4 to the negative control (solvent = acetonitrile) and well 5 to the positive control (Ketoconazol). (B) A caryoynencin-containing fraction inhibits the growth of *P. lilacinum* *in vitro* (upper picture). Negative control (solvent = methanol) (lower picture).

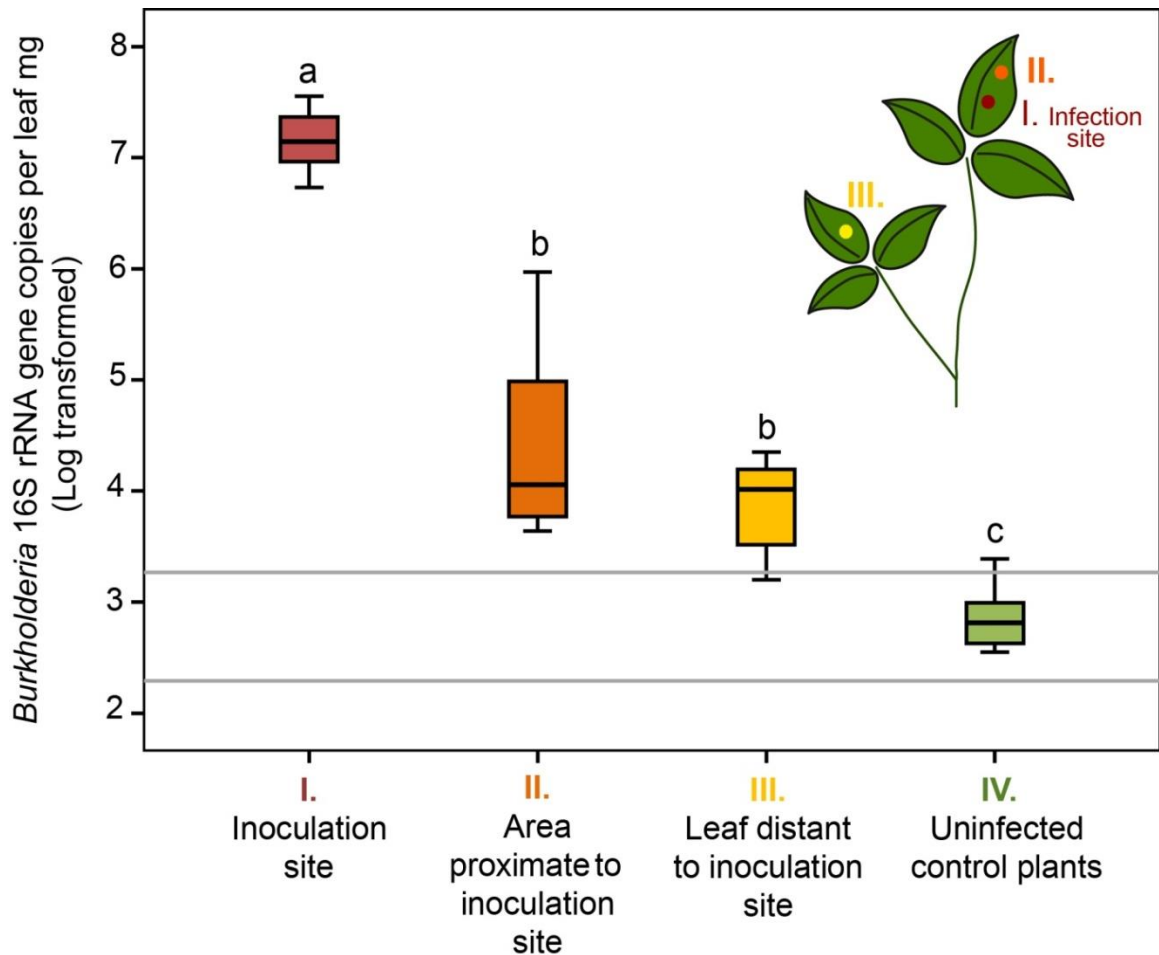

**Supplementary Fig. 22. *Burkholderia* symbionts of *L. villosa* can establish a systemic infection in soybean plants.** 38 days after infection, *B. gladioli* Lv-StA were found in higher concentration in plant tissues adjacent to the infection site. Significant titers of bacteria were also detected in areas proximate to the inoculation site, as well as in distant leaves (ANOVA, n = 18 per group, p < 0.001; Tukey test), demonstrating dispersal within the plant, probably via the vascular tissues. Bacteria were quantified using qPCR of a 167 bp region of the 16S rRNA gene as described in the methods section (*Plant fitness effect upon B. gladioli* infection). Gray lines correspond to the maximum and minimum values obtained for negative controls in the same qPCR run. Different letters above boxes represent significant differences according to an ANOVA with Tukey post-hoc tests. The center value of the boxplots represents the median, and the whiskers denote minimum and maximum values.

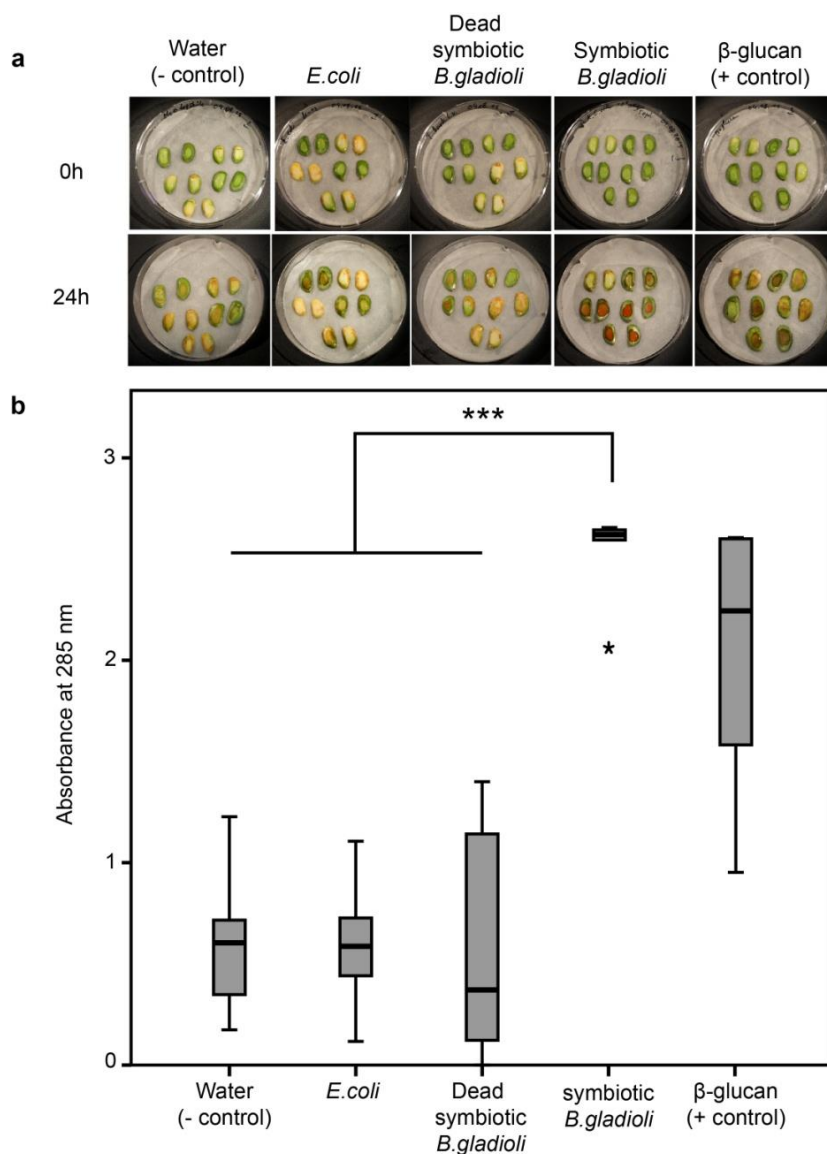

**Supplementary Fig. 23. *Burkholderia* symbionts of *L. villosa* elicit a defense response in soybean cotyledons.** Cotyledon assay determining glyceollin production by soybean upon inoculation with *B. gladioli* symbionts isolated from *L. villosa*, in comparison with negative (water, *E. coli* and dead *B. gladioli*) and positive controls ( $\beta$ -glucan). (A) Red coloration after 24h is indicative of glyceollin production as observed in *B. gladioli* and  $\beta$ -glucan treatments; (B) UV-spectrophotometric measurements at 285 nm support significant differences in glyceollin amounts in the different treatments (Kruskall Wallis test with Dunn post-hoc test,  $n = 8$  cotyledons per group,  $***p < 0.001$ ). The center value of the boxplots represents the median, the whiskers denote minimum and maximum values, and the star represents an extreme outlier (more than 3 interquartile ranges from nearest box edge).

**Supplementary Table 1. 16S rRNA gene sequences from *Burkholderia* symbionts of Lagriinae, and selected references used for phylogenetic reconstruction (Fig. 2b and Supplementary Fig. 2).**

| <i>Sequence Id.</i>                                                | <i>Category<sup>a</sup></i>                | <i>Strain</i> | <i>Accession</i> |
|--------------------------------------------------------------------|--------------------------------------------|---------------|------------------|
| <i>Lagria nigricollis</i> Symbiont                                 | Lagriinae symbiont                         | Ln            | KT888028         |
| <i>Lagria okinawana</i> Symbiont                                   | Lagriinae symbiont                         | Lo            | KT888029         |
| <i>Lagria rufipennis</i> Symbiont                                  | Lagriinae symbiont                         | Lr            | KT888030         |
| <i>Lagria villosa</i> Symbiont                                     | Lagriinae symbiont                         | Lv-StA        | KT888027         |
| <i>Lagria villosa</i> Symbiont                                     | Lagriinae symbiont                         | Lv-StB        | KU358661         |
| <i>Lagria villosa</i> Symbiont                                     | Lagriinae symbiont                         | Lv-StC        | KU358661         |
| <i>Lagria hirta</i> Symbiont                                       | Lagriinae symbiont                         | Lh-StG        | KT888026         |
| <i>Lagria hirta</i> Symbiont                                       | Lagriinae symbiont                         | Lh-StH        | KU574041         |
| <i>Lagria hirta</i> Symbiont                                       | Lagriinae symbiont                         | Lh-StM        | KU574046         |
| <i>Ecnolagria</i> sp. Symbiont                                     | Lagriinae symbiont                         | Ec            | KT888031         |
| <i>Burkholderia gladioli</i> BSR3 - Rice pathogen                  | Plant pathogen - <i>B. gladioli</i> clade  | BSR3          | NR_102847        |
| <i>Burkholderia gladioli</i> MS102 - Corn pathogen                 | Plant pathogen - <i>B. gladioli</i> clade  | MS 102        | EU053154         |
| <i>Burkholderia gladioli</i> CH-2 - Onion pathogen                 | Plant pathogen - <i>B. gladioli</i> clade  | CH-2          | AY500138         |
| <i>Burkholderia gladioli</i> st3 - Orchid pathogen                 | Plant pathogen - <i>B. gladioli</i> clade  | strain 3      | DQ090078         |
| <i>Burkholderia gladioli</i> - Rice pathogen                       | Plant pathogen - <i>B. gladioli</i> clade  | 321gr-6       | DQ355169         |
| <i>Burkholderia gladioli</i> pv. <i>agaricicola</i>                | Fungal pathogen - <i>B. gladioli</i> clade | CFBP 3580     | GU936678         |
| <i>Burkholderia gladioli</i> pv. <i>alliicola</i>                  | Plant pathogen - <i>B. gladioli</i> clade  | CFBP 2422     | GU936679         |
| <i>Burkholderia gladioli</i> pv. <i>gladioli</i>                   | Plant pathogen - <i>B. gladioli</i> clade  | CFBP 2427     | GU936677         |
| <i>Burkholderia plantarii</i>                                      | Plant pathogen                             | -             | U96933           |
| <i>Burkholderia plantarii</i> - 2396                               | Plant pathogen                             | 2396          | AB183679         |
| <i>Burkholderia plantarii</i> - NBRC104888                         | Plant pathogen                             | NBRC104888    | AB682222.1       |
| <i>Burkholderia glumae</i> 336gr-1 - Rice pathogen                 | Plant pathogen                             | 336gr-1       | DQ355164.1       |
| <i>Burkholderia glumae</i> - 99gr-4b - Rice pathogen               | Plant pathogen                             | 99gr-4b       | DQ355167         |
| <i>Burkholderia glumae</i> - PA27.4 - Rice pathogen                | Plant pathogen                             | PA27.4        | EF193641.1       |
| <i>Burkholderia caryophylli</i>                                    | Plant pathogen                             | ATCC 25418    | AB021423         |
| <i>Burkholderia endofungorum</i>                                   | Fungal endosymbiont- plant pathogen        | HKI 456T      | AM420302         |
| <i>Burkholderia rhizoxinica</i>                                    | Fungal endosymbiont- plant pathogen        | HKI 454       | AJ938142         |
| <i>Burkholderia cepacia</i>                                        | Plant and animal pathogen - BCC            | ATCC 25416    | U96927           |
| <i>Burkholderia vietnamiensis</i>                                  | Opportunistic animal pathogen - BCC        | LMG 10929     | AF097534         |
| <i>Burkholderia oklahomensis</i>                                   | Animal pathogen - Pseudomallei group       | C6786         | DQ108388         |
| <i>Burkholderia fungorum</i>                                       | PBE                                        | LM16225       | AF215705         |
| <i>Burkholderia kururiensis</i>                                    | PBE                                        | -             | AB024310         |
| <i>Burkholderia nodosa</i>                                         | PBE                                        | Br3437        | AY773189         |
| <i>Burkholderia terrae</i>                                         | PBE                                        | KMY02         | AB201285         |
| 'Ca. <i>Burkholderia kirkii</i> '                                  | PBE                                        | 835462        | AF475068         |
| <i>Burkholderia</i> sp. [ <i>P. antennata</i> symbiont]            | Insect-associated                          | PAN136        | AB558189         |
| <i>Burkholderia</i> sp. [ <i>P. bicoloripes</i> symbiont]          | Insect-associated                          | PBI_clone1    | AB558203.1       |
| <i>Burkholderia</i> sp. [ <i>R. pedestris</i> symbiont]            | Insect-associated                          | RPE64         | AB558208         |
| <i>Burkholderia</i> sp. [ <i>Tetraponera binghami</i> gut isolate] | Insect-associated                          | -             | AF459796         |
| <i>Ralstonia pickettii</i>                                         | Outgroup                                   | 12J           | NC010678         |

<sup>a</sup>Except for Lagriinae symbionts and insect-associated strains, the categorization is based on previous studies<sup>1,2</sup>

**Supplementary Table 2. Toxoflavin (1) (*tox*) biosynthetic genes and predicted functions of proteins.**

| <b>Gene</b> | <b>Length (bp)</b> | <b>Putative protein</b>                          | <b>Homologous protein</b> | <b>Accession number</b> | <b>Identity/Similarity</b> |
|-------------|--------------------|--------------------------------------------------|---------------------------|-------------------------|----------------------------|
| <i>toxA</i> | 612                | S-Adenosylmethionine-dependent methyltransferase | ToxA ( <i>B. glumae</i> ) | BAA92862.2              | 98%/98%                    |
| <i>toxB</i> | 543                | GTP cyclohydrolase II                            | ToxB ( <i>B. glumae</i> ) | BAB88913.1              | 98%/98%                    |
| <i>toxC</i> | 1692               | WD-repeat protein                                | ToxC ( <i>B. glumae</i> ) | BAB88914.2              | 97%/98%                    |
| <i>toxD</i> | 933                | TRP-2                                            | ToxD ( <i>B. glumae</i> ) | BAB88915.1              | 89%/91%                    |
| <i>toxE</i> | 1170               | Deaminase                                        | ToxE ( <i>B. glumae</i> ) | BAB88916.2              | 92%/94%                    |
| <i>toxR</i> | 600                | LysR family transcriptional regulator            | ToxR ( <i>B. glumae</i> ) | BAC77727.1              | 88%/90%                    |

**Supplementary Table 3. Caryoynencin (2) (*cay*) biosynthetic genes and predicted functions of proteins.**

| Gene        | Length (bp) | Putative protein                   | Homologous protein             | Accession number | Identity/Similarity |
|-------------|-------------|------------------------------------|--------------------------------|------------------|---------------------|
| <i>cayA</i> | 1557        | Fatty acyl-AMP ligase              | CayA ( <i>B. caryophylli</i> ) | AIG53814.1       | 76%/85%             |
| <i>cayB</i> | 930         | Fatty acid desaturase              | CayB ( <i>B. caryophylli</i> ) | AIG53817.1       | 85%/89%             |
| <i>cayC</i> | 975         | Fatty acid desaturase              | CayC ( <i>B. caryophylli</i> ) | AIG53820.1       | 85%/91%             |
| <i>cayD</i> | 324         | Phosphopantetheine attachment site | CayD ( <i>B. caryophylli</i> ) | AIG53823.1       | 81%/93%             |
| <i>cayE</i> | 1101        | Fatty acid desaturase              | CayE ( <i>B. caryophylli</i> ) | AIG53826.1       | 88%/94%             |
| <i>cayF</i> | 975         | Alpha/Beta hydrolase               | CayF ( <i>B. caryophylli</i> ) | AIG53829.1       | 74%/83%             |
| <i>cayG</i> | 1197        | Cytochrome P450 monooxygenase      | CayG ( <i>B. caryophylli</i> ) | AIG53832.1       | 79%/90%             |

**Supplementary Table 4. Lagriene (3) (*lag*) biosynthetic genes and predicted functions of proteins.**

| Gene        | Length (bp) | Description         | Domains                                                |
|-------------|-------------|---------------------|--------------------------------------------------------|
| <i>lagD</i> | 16284       | Polyketide synthase | KS-ACP-ACP ER<br>KS-KR-ACP<br>KS-DH-KR-ACP<br>KS-DH-KR |
| <i>lagE</i> | 11178       | Polyketide synthase | ACP KS-KR-ACP<br>KS-ACP-ACP<br>KS-KR                   |
| <i>lagF</i> | 9927        | Polyketide synthase | MT-ACP<br>KS-KR-ACP<br>KS-KR-ACP<br>KS                 |
| <i>lagG</i> | 14991       | Polyketide synthase | DH-KR-ACP<br>KS-KR-ACP<br>KS-MT-ACP<br>KS-KR-ACP<br>KS |
| <i>lagH</i> | 10800       | Polyketide synthase | DH-ACP<br>KS-KR-ACP<br>KS-DH-KR-MT-ACP                 |
| <i>lagI</i> | 17523       | Polyketide synthase | ER KS-KR-ACP<br>KS-KR-MT-ACP<br>KS-KR-ACP<br>KS-KR TE  |

**Supplementary Table 5. Proteins encoded upstream and downstream of the *lagD-lagI* gene cluster.**

| Gene               | Length (bp) | Putative protein                              | Homologous protein                                                                 | Accession number | Identity/Similarity |
|--------------------|-------------|-----------------------------------------------|------------------------------------------------------------------------------------|------------------|---------------------|
| <i>orf-16</i>      | 1353        | MATE efflux protein                           | sce3194<br>( <i>Sorangium cellulosum</i> Soce56)                                   | CAN93353.1       | 68%/82%             |
| <i>orf-15</i>      | 975         | Malonyl CoA-acyl carrier protein transacylase | sce3195<br>( <i>Sorangium cellulosum</i> So ce56)                                  | CAN93354.1       | 47%/63%             |
| <i>orf-14</i>      | 855         | 4'-Phosphopantetheinyl transferase            | sce5058<br>( <i>Sorangium cellulosum</i> So ce56)                                  | CAN95221.1       | 41%/56%             |
| <i>orf-13</i>      | 1173        | Malonyl CoA-acyl carrier protein transacylase | Malonyl CoA-acyl carrier protein transacylase ( <i>Burkholderia pseudomallei</i> ) | 3G87_A           | 51%/62%             |
| <i>orf-12</i>      | 1401        | Amidase                                       | sce3176<br>( <i>Sorangium cellulosum</i> So ce56)                                  | CAN93335.1       | 56%/69%             |
| <i>orf-11</i>      | 360         | Alpha/beta-hydrolase                          | sce3177<br>( <i>Sorangium cellulosum</i> So ce56)                                  | CAN93336.1       | 58%/76%             |
| <i>orf-10</i>      | 3234        | Hypothetical protein                          | SorM<br>( <i>Sorangium cellulosum</i> So ce12)                                     | ADN68497.1       | 38%/51%             |
| <i>orf-9</i>       | 747         | Enoyl-CoA hydratase                           | sce3179<br><br>( <i>Sorangium cellulosum</i> So ce56)                              | CAN93338.1       | 75%/83%             |
| <i>orf-8</i>       | 789         | Enoyl-CoA hydratase                           | sce3180<br><br>( <i>Sorangium cellulosum</i> So ce56)                              | CAN93339.1       | 63%/78%             |
| <i>orf-7</i>       | 1260        | 3-Hydroxy-3-methylglutaryl CoA synthase       | sce3181/EtnO<br>( <i>Sorangium cellulosum</i> So ce56)                             | CAN93340.1       | 76%/86%             |
| <i>orf-6</i>       | 1227        | Beta-ketoacyl synthase                        | sce3182/EtnP<br><br>( <i>Sorangium cellulosum</i> So ce56)                         | CAN93341.1       | 64%/76%             |
| <i>orf-5</i>       | 246         | Acyl carrier protein                          | sce3183<br>( <i>Sorangium cellulosum</i> So ce56)                                  | CAN93342.1       | 68%/81%             |
| <i>orf-4</i>       | 1395        | Malonyl CoA-acyl carrier protein transacylase | sce3184<br>( <i>Sorangium cellulosum</i> So ce56)                                  | CAN93343.1       | 68%/82%             |
| <i>orf-3</i>       | 264         | Acyl carrier protein                          | sce3185<br><br>( <i>Sorangium cellulosum</i> So ce56)                              | CAN93344.1       | 60%/81%             |
| <i>orf-2</i>       | 609         | Malonyl CoA-acyl carrier protein transacylase | sce3186/EtnB<br><br>( <i>Sorangium cellulosum</i> So ce56)                         | CAN93345.1       | 55%/70%             |
| <i>orf-1</i>       | 1968        | Asparagine synthase                           | sce3187/EtnC<br>( <i>Sorangium cellulosum</i> So ce56)                             | CAN93346.1       | 66%/79%             |
| <i>orf+1</i>       | 486         | Hypothetical protein                          | -                                                                                  | -                | -                   |
| <i>orf+2</i>       | 924         | Hypothetical protein                          | -                                                                                  | -                | -                   |
| <i>orf+3</i>       | 609         | Glutathione-S-transferase                     | Glutathione-S-transferase ( <i>Yersinia pestis</i> )                               | 4G9H_A           | 47%/65%             |
| <i>orf+4</i>       | 954         | LysR family transcriptional regulator         | LysR family transcriptional regulator ( <i>Neisseria meningitidis</i> )            | 3HHG_A           | 34%/54%             |
| <i>orf+5</i>       | 2124        | TonB-dependent siderophore receptor           | TonB-dependent siderophore receptor ( <i>Pseudomonas fluorescens</i> )             | 3QLB_A           | 24%/37%             |
| <i>orf+6</i>       | 858         | Molybdate ABC transporter                     | Molybdate-binding protein ( <i>Xanthomonas axonopodis</i> pv. <i>citri</i> )       | 3GZG_A           | 26%/39%             |
| 2400/ <i>orf+7</i> | 1092        | Oxidoreductase                                | Luciferase-like monooxygenase ( <i>Bacillus cereus</i> )                           | 3RAO_A           | 36%/54%             |



**Supplementary Table 6. Microbial strains used for *in vivo* and *in vitro* activity bioassays.**

| Species                            | Strain        | Source                                  | Location                                    | Accession Number/<br>Database Identifier | Database                             |
|------------------------------------|---------------|-----------------------------------------|---------------------------------------------|------------------------------------------|--------------------------------------|
| <i>Purpureocillium lilacinum</i>   | LV1           | <i>Lagria villosa</i> egg               | MPI-CE, Jena, Germany                       | KY630747, KY630748, KY630749             | GenBank                              |
| <i>Trichoderma harzianum</i>       | LESF555       | <i>Achromyrmex heyeri</i> fungal garden | Sentinela do Sul, Rio Grande do Sul, Brazil | KT279018, KT278950, KT278904             | GenBank                              |
| <i>Beauveria bassiana</i>          | LESF477       | <i>Atta</i> sp. female alate            | Botucatu, Sao Paulo, Brazil                 | CRM 1216                                 | CRM - UNESP                          |
| <i>Candida albicans</i>            | BMSY 212      | Jena Microbial Resource Collection      | Jena, Germany                               | STI50163                                 | JMRC - Friedrich Schiller University |
| <i>Penicillium notatum</i>         | JP 36         | Jena Microbial Resource Collection      | Jena, Germany                               | SF011781                                 | JMRC - Friedrich Schiller University |
| <i>Aspergillus fumigatus</i>       | ATCC46645     | Jena Microbial Resource Collection      | Jena, Germany                               | STH00450                                 | JMRC - Friedrich Schiller University |
| <i>Sporobolomyces salmonicolor</i> | SBUG 549      | Jena Microbial Resource Collection      | Jena, Germany                               | ST035974                                 | JMRC - Friedrich Schiller University |
| <i>Bacillus thuringiensis</i>      | DSM2048       | Jena Microbial Resource Collection      | Jena, Germany                               | STI11409                                 | JMRC - Friedrich Schiller University |
| <i>Bacillus subtilis</i>           | ATCC 6633     | Jena Microbial Resource Collection      | Jena, Germany                               | STI10880                                 | JMRC - Friedrich Schiller University |
| <i>Brevibacillus laterosporus</i>  | ATCC 31932    | Jena Microbial Resource Collection      | Jena, Germany                               | STI11381                                 | JMRC - Friedrich Schiller University |
| <i>Staphylococcus aureus</i>       | SG 511        | Jena Microbial Resource Collection      | Jena, Germany                               | STI10760                                 | JMRC - Friedrich Schiller University |
| <i>Escherichia coli</i>            | SG 458        | Jena Microbial Resource Collection      | Jena, Germany                               | ST033699                                 | JMRC - Friedrich Schiller University |
| <i>Pseudomonas aeruginosa</i>      | SG 137        | Jena Microbial Resource Collection      | Jena, Germany                               | ST033772                                 | JMRC - Friedrich Schiller University |
| <i>Pseudomonas aeruginosa</i>      | K 799/61      | Jena Microbial Resource Collection      | Jena, Germany                               | ST033771                                 | JMRC - Friedrich Schiller University |
| <i>Staphylococcus aureus</i>       | 134/93 (MRSA) | Jena Microbial Resource Collection      | Jena, Germany                               | STH00435                                 | JMRC - Friedrich Schiller University |
| <i>Enterococcus faecalis</i>       | 1528 (VRE)    | Jena Microbial Resource Collection      | Jena, Germany                               | ST033700                                 | JMRC - Friedrich Schiller University |
| <i>Mycobacterium vaccae</i>        | IMET 10670    | Jena Microbial Resource Collection      | Jena, Germany                               | STI10670                                 | JMRC - Friedrich Schiller University |

**Supplementary References**

1. Z. R. Suárez-Moreno *et al.*, Common features of environmental and potentially beneficial plant-associated *Burkholderia*. *Microb. Ecol.* **63**, 249–266 (2012).
2. B. Verstraete, S. Janssens, E. Smets, S. Dessein, Symbiotic  $\beta$ -proteobacteria beyond legumes: *Burkholderia* in Rubiaceae. *PLoS One.* **8** (2013), doi:10.1371/journal.pone.0055260.
